# Supplementary material for: The CDK Pef1 and protein phosphatase 4 oppose each other for regulating cohesin binding to fission yeast chromosomes
Source: eLife. 2020 Jan 2;9:e50556. doi: 10.7554/eLife.50556 (PMC6954021; doi:10.7554/eLife.50556)
Supplement: Figure 1—source data 1. [file elife-50556-fig1-data1.xlsx]

## Sheet: Figure 1C
		Figure 1C	no lag	lag
		wt	63	0
		mis4-367	21	31
		mis4-367 pef1D	56	11
		mis4-367 pef1-as DMSO	10	29
		mis4-367 pef1-as 1-NA-PP1	32	4
		Table Analyzed	DMSO vs 1-NA-PP1
		Fisher's exact test
		P value	< 0.0001
		P value summary	***
		One- or two-sided	Two-sided
		Statistically significant? (alpha<0.05)	Yes
		Data analyzed	no lag	lag	Total
		DMSO	10	29	39
		1-NA-PP1	32	4	36
		Total	42	33	75
		Table Analyzed	mis4-367 vs mis4-367 pef1D
		Fisher's exact test
		P value	< 0.0001
		P value summary	***
		One- or two-sided	Two-sided
		Statistically significant? (alpha<0.05)	Yes
		Data analyzed	no lag	lag	Total
		mis4-367	21	31	52
		mis4-367 pef1D	56	11	67
		Total	77	42	119

## Sheet: Figure 1D
		Time of 1-NA-PP1 addition (min)	no lag	lag
		90	35	3
		135	25	22
		180	28	34
		225	39	29
		270	25	23
		Table Analyzed	90min vs 135min
		Fisher's exact test
		P value	< 0.0001
		P value summary	***
		One- or two-sided	Two-sided
		Statistically significant? (alpha<0.05)	Yes
		Data analyzed	no lag	lag	Total
		90min	35	3	38
		135min	25	22	47
		Total	60	25	85

## Sheet: Figure 1E
	Table Analyzed	DMSO vs NAPP1
	Fisher's exact test
	P value	< 0.0001
	P value summary	***
	One- or two-sided	Two-sided
	Statistically significant? (alpha<0.05)	Yes
	Data analyzed	<0,3µ	>0,3µ	Total
	DMSO	57	69	126
	NAPP1	113	16	129
	Total	170	85	255
