# Supplementary material for: The CDK Pef1 and protein phosphatase 4 oppose each other for regulating cohesin binding to fission yeast chromosomes
Source: eLife. 2020 Jan 2;9:e50556. doi: 10.7554/eLife.50556 (PMC6954021; doi:10.7554/eLife.50556)
Supplement: Figure 2—source data 1. [file elife-50556-fig2-data1.xlsx]

## Sheet: Data Fig.2B and S2B
%IP A	438	tRNA-L	imr2-L	cc2	dg2-R	tRNA-R	1806	2898	3323	28S	NTS	Tel1-R
no tag DMSO	0.00052085	0.000448666	0.000677724	0.000462314	0.000644359	0.000496613	0.000590496	0.000479616	0.000534876	0.000651052	0.000530921	0.000520376
no tag 1-NA-PP1	0.000431846	0.000380918	0.000575233	0.000540363	0.000672138	0.00049028	0.000403329	0.000375804	0.000407454	0.00058285	0.000503378	0.000554577
mis4-367 DMSO	0.0023198	0.00288635	0.00917082	0.0042753	0.00772269	0.00322419	0.00102726	0.00186423	0.00201257	0.00269562	0.00496172	0.00408014
mis4-367 1-NA-PP1	0.00267285	0.00304271	0.011355	0.0041238	0.0102693	0.0034154	0.00127375	0.00182587	0.00200097	0.00254348	0.00544576	0.00482732
mis4-367 pef1-as DMSO	0.00350618	0.00322082	0.0120057	0.00378924	0.00968432	0.00459685	0.00125608	0.00242406	0.00259728	0.0033091	0.00752293	0.00559921
mis4-367 pef1-as 1-NA-PP1	0.00453385	0.00519075	0.0192261	0.00427146	0.0203942	0.00456989	0.00266998	0.00503116	0.00399596	0.00471739	0.0130389	0.0123563
mis4+ DMSO	0.00991658	0.0127378	0.0364087	0.0187023	0.0318764	0.0132701	0.0113711	0.0252718	0.0179706	0.0091617	0.0171526	0.0171542
%IP 1-NA-PP1 / %IP DMSO
mis4-367 pef1+	1.15219	1.05417	1.23817	0.964563	1.32976	1.05931	1.23995	0.979422	0.994232	0.943558	1.09756	1.18313
mis4-367 pef1-as	1.2931	1.61162	1.60141	1.12726	2.1059	0.994135	2.12564	2.07551	1.53852	1.42558	1.73322	2.20679
%IP B
no tag DMSO	0.0006529	0.0006459	0.00088682	0.00539721	0.00081572	0.00071142	0.000558578	0.000795981	0.000670336	0.00180271	0.00150807	0.000546487
no tag 1-NA-PP1	0.00034828	0.000344448	0.00046832	0.000498287	0.000550267	0.000418388	0.000366439	0.000357851	0.00036409	0.000449202	0.000416834	0.00039952
mis4-367 DMSO	0.00188961	0.00252397	0.00768918	0.00364362	0.00782956	0.00251857	0.000989598	0.00137931	0.00156085	0.00210698	0.00401976	0.00304907
mis4-367 1-NA-PP1	0.00212	0.00264722	0.0105963	0.003827	0.0115161	0.00305071	0.00114182	0.00164075	0.00188272	0.00220121	0.00432155	0.00367403
mis4-367 pef1-as DMSO	0.0014327	0.00270661	0.00950481	0.0034613	0.00972371	0.00295788	0.00123521	0.0015722	0.00191026	0.00229276	0.00521881	0.00388058
mis4-367 pef1-as 1-NA-PP1	0.00336871	0.00494879	0.0188426	0.00585193	0.0219318	0.00421854	0.00255216	0.00400354	0.00387597	0.00423833	0.0119136	0.0111807
mis4+ DMSO	0.0127596	0.0115372	0.0309085	0.0188718	0.0362758	0.0129885	0.0112169	0.0247421	0.0171846	0.00908159	0.0162482	0.0193783
%IP 1-NA-PP1 / %IP DMSO
mis4-367 pef1+	1.12193	1.04883	1.37808	1.05033	1.47085	1.21129	1.15382	1.18954	1.20621	1.04472	1.07507	1.20497
mis4-367 pef1-as	2.3513	1.82841	1.98243	1.69067	2.25549	1.4262	2.06618	2.54646	2.02903	1.84858	2.28282	2.88119
%IP C
no tag DMSO	0.000299137	0.000223364	0.000349718	0.000161296	0.000365184	0.000229172	0.000234855	0.000257103	0.000274004	0.000399108	0.000376193	0.000305493
no tag 1-NA-PP1	0.000469343	0.000381694	0.000590121	0.00029924	0.000544193	0.000431029	0.000192971	0.000585355	0.000466932	0.000520256	0.000468859	0.000542869
mis4-367 DMSO	0.00215145	0.00242499	0.00819407	0.00230939	0.00571162	0.00223491	0.000835967	0.00138413	0.00170972	0.00218515	0.00425699	0.00347758
mis4-367 1-NA-PP1	0.00224228	0.00270698	0.0109538	0.003844	0.00983299	0.00294898	0.00111426	0.00160966	0.00189448	0.00261113	0.0049734	0.00459995
mis4-367 pef1-as DMSO	0.0019776	0.00271502	0.00819797	0.00253266	0.00704467	0.00264561	0.00121924	0.00172603	0.00191476	0.00222521	0.0046379	0.00364456
mis4-367 pef1-as 1-NA-PP1	0.00244364	0.00356491	0.0135378	0.00314903	0.0125899	0.00237278	0.00192205	0.00291443	0.0027979	0.00337177	0.0104363	0.00692793
mis4+ DMSO	0.0163174	0.0156789	0.0419527	0.0181191	0.0356177	0.0145297	0.0109543	0.025582	0.0211086	0.0105694	0.0186811	0.0231425
%IP 1-NA-PP1 / %IP DMSO
mis4-367 pef1+	1.04222	1.11628	1.3368	1.66451	1.72158	1.31951	1.3329	1.16294	1.10806	1.19494	1.16829	1.32274
mis4-367 pef1-as	1.23566	1.31303	1.65136	1.24337	1.78716	0.896873	1.57644	1.68852	1.46123	1.51526	2.25022	1.90089
%IP D
no tag DMSO	0.000266452	0.00018443	0.000285133	0.000155596		0.000237717	0.00022075	0.000188319	0.000214236	0.000341383	0.000316149	0.000301893
no tag 1-NA-PP1	0.000227522	0.000182504	0.000294225	0.000222287		0.000256563	0.000191766	0.000233233	0.000242084	0.000301731	0.000267396	0.000257738
mis4-367 DMSO	0.00176429	0.0019793	0.00725346	0.0023531	0.00459096	0.00220715	0.000779835	0.00124963	0.00131302	0.00172823	0.00364994	0.00337393
mis4-367 1-NA-PP1	0.00190011	0.00233432	0.00885948	0.00244133	0.00673727	0.00229238	0.00114427	0.0014248	0.00150139	0.00209875	0.00366772	0.00355741
mis4-367 pef1-as DMSO	0.00168755	0.00228382	0.00790834	0.00171378	0.00594993	0.00225079	0.00118059	0.00141691	0.00168169	0.00206197	0.00452412	0.00381071
mis4-367 pef1-as 1-NA-PP1	0.00212369	0.00332871	0.0126376	0.00255848	0.0105871	0.00256761	0.00186492	0.00276315	0.00244354	0.00299941	0.00841706	0.00736865
mis4+ DMSO	0.0116315	0.0123088	0.0348904	0.0150378	0.0253672	0.0126011	0.0108971	0.0211379	0.0182427	0.00960864	0.0177097	0.0173372
%IP 1-NA-PP1 / %IP DMSO
mis4-367 pef1+	1.07698	1.17937	1.22141	1.0375	1.46751	1.03862	1.46732	1.14018	1.14346	1.21439	1.00487	1.05438
mis4-367 pef1-as	1.25845	1.45751	1.59801	1.49288	1.77937	1.14076	1.57965	1.95013	1.45302	1.45463	1.86049	1.93367
1-NA-PP1 / DMSO Mean ratio (Fig2B)
mis4-367 pef1+	1.09833	1.09966	1.29362	1.17922	1.49742	1.15718	1.2985	1.11802	1.11299	1.0994	1.08645	1.1913
mis4-367 pef1-as	1.53463	1.55264	1.7083	1.38855	1.98198	1.11449	1.83698	2.06515	1.62045	1.56101	2.03169	2.23064
SD
mis4-367 pef1+	0.0485175	0.0613244	0.0759113	0.325719	0.163256	0.13281	0.134219	0.0945764	0.0889686	0.128618	0.0673435	0.109966
mis4-367 pef1-as	0.544958	0.220595	0.18437	0.252662	0.237467	0.230721	0.299975	0.359094	0.275093	0.195315	0.276416	0.454867
Mean IP% (Fig.S2B)
no tag DMSO	0.000434835	0.00037559	0.000549849	0.0015441	0.000608421	0.000418731	0.00040117	0.000430255	0.000423363	0.000798563	0.000682833	0.000418562
no tag 1-NA-PP1	0.000369248	0.000322391	0.000481975	0.000390044	0.000588866	0.000399065	0.000288626	0.000388061	0.00037014	0.00046351	0.000414117	0.000438676
mis4-367 DMSO	0.00203129	0.00245365	0.00807688	0.00314535	0.00646371	0.0025462	0.000908165	0.00146932	0.00164904	0.002179	0.0042221	0.00349518
mis4-367 1-NA-PP1	0.00223381	0.00268281	0.0104412	0.00355903	0.00958892	0.00292687	0.00116852	0.00162527	0.00181989	0.00236364	0.00460211	0.00416468
mis4-367 pef1-as DMSO	0.00215101	0.00273157	0.00940421	0.00287425	0.00810066	0.00311278	0.00122278	0.0017848	0.002026	0.00247226	0.00547594	0.00423377
mis4-367 pef1-as 1-NA-PP1	0.00311747	0.00425829	0.016061	0.00395772	0.0163758	0.0034322	0.00225228	0.00367807	0.00327834	0.00383173	0.0109515	0.00945839
mis4+ DMSO	0.0126563	0.0130657	0.0360401	0.0176828	0.0322843	0.0133473	0.0111098	0.0241835	0.0186266	0.00960532	0.0174479	0.0192531
SD
no tag DMSO	0.000184136	0.000214572	0.000282859	0.00257273	0.000227408	0.000231251	0.000200694	0.000273683	0.000215618	0.0006828	0.000557549	0.000133076
no tag 1-NA-PP1	0.000107181	9.48631e-05	0.000136418	0.000153514	7.21796e-05	0.000100037	0.000112166	0.000146013	9.52118e-05	0.000120885	0.000104081	0.000139715
mis4-367 DMSO	0.000251022	0.000373275	0.000824375	0.000974945	0.00158361	0.000473388	0.000119019	0.000270542	0.000292418	0.000398045	0.00055274	0.000430581
mis4-367 1-NA-PP1	0.000325132	0.0002903	0.00109905	0.000757457	0.00203046	0.000467996	7.146e-05	0.000164226	0.000218894	0.000251756	0.000774898	0.000642412
mis4-367 pef1-as DMSO	0.000930469	0.000383294	0.0018682	0.000939008	0.00190464	0.00103082	3.1918e-05	0.000444465	0.000396097	0.000566246	0.00139816	0.00091566
mis4-367 pef1-as 1-NA-PP1	0.0010818	0.000947129	0.00345646	0.00144894	0.0056231	0.00112288	0.000417732	0.00105783	0.000774564	0.00078614	0.00199763	0.00271627
mis4+ DMSO	0.0027062	0.0018116	0.00457345	0.00179252	0.00500188	0.000834596	0.000222987	0.00205975	0.00171437	0.000683256	0.00101914	0.00278203

## Sheet: t-test_Fig.2B
%IP 1-NA-PP1 / %IP DMSO	438	tRNA-L	imr2-L	cc2	dg2-R	tRNA-R	1806	2898	3323	28S	NTS	Tel1-R
mis4-367 pef1+	1.15219	1.05417	1.23817	0.964563	1.32976	1.05931	1.23995	0.979422	0.994232	0.943558	1.09756	1.18313
mis4-367 pef1+	1.12193	1.04883	1.37808	1.05033	1.47085	1.21129	1.15382	1.18954	1.20621	1.04472	1.07507	1.20497
mis4-367 pef1+	1.04222	1.11628	1.3368	1.66451	1.72158	1.31951	1.3329	1.16294	1.10806	1.19494	1.16829	1.32274
mis4-367 pef1+	1.07698	1.17937	1.22141	1.0375	1.46751	1.03862	1.46732	1.14018	1.14346	1.21439	1.00487	1.05438
mis4+ pef1-as	0.818048	0.9756	1.43431	1.69992	1.80428	0.855369	1.3952		1.03213	1.07954	1.67186	1.74769
mis4+ pef1-as	0.843325	1.20976	1.51706	1.35289	1.68747	0.857898	1.38448	1.13083	1.05478	1.16813	1.53271	1.78226
mis4+ pef1-as	0.889064	1.08275	1.33301	1.71695	1.66678	0.923051	1.01709	1.08849	1.01005	1.12705	1.7266	1.62966
mis4+ pef1-as	1.00577	0.964174	1.36507	1.06382	1.43032	0.77752	1.09612	0.968294	0.815871	1.08365	1.57019	1.68916
Unpaired t test
mis4-367 pef1+ vs mis4+ pef1-as
P value	0.16	0.0078	0.006	0.3456	0.015	0.7612	0.0168	0.0022	0.013	0.0071	0.0006	0.0043
P value summary	ns	**	**	ns	*	ns	*	**	*	**	***	**
Are means signif. different? (P < 0.05)	No	Yes	Yes	No	Yes	No	Yes	Yes	Yes	Yes	Yes	Yes
One- or two-tailed P value?	Two-tailed	Two-tailed	Two-tailed	Two-tailed	Two-tailed	Two-tailed	Two-tailed	Two-tailed	Two-tailed	Two-tailed	Two-tailed	Two-tailed

## Sheet: Data Fig.2C
%IP A	438	tRNA-L	imr2-L	cc2	dg2-R	tRNA-R	1806	2898	3323	28S	NTS	Tel1-R
no tag DMSO	0.00052085	0.000448666	0.000677724	0.000462314	0.000644359	0.000496613	0.000590496	0.000479616	0.000534876	0.000651052	0.000530921	0.000520376
no tag 1-NA-PP1	0.000431846	0.000380918	0.000575233	0.000540363	0.000672138	0.00049028	0.000403329	0.000375804	0.000407454	0.00058285	0.000503378	0.000554577
mis4-367 DMSO	0.0023198	0.00288635	0.00917082	0.0042753	0.00772269	0.00322419	0.00102726	0.00186423	0.00201257	0.00269562	0.00496172	0.00408014
mis4-367 1-NA-PP1	0.00267285	0.00304271	0.011355	0.0041238	0.0102693	0.0034154	0.00127375	0.00182587	0.00200097	0.00254348	0.00544576	0.00482732
mis4-367 pef1-as DMSO	0.00350618	0.00322082	0.0120057	0.00378924	0.00968432	0.00459685	0.00125608	0.00242406	0.00259728	0.0033091	0.00752293	0.00559921
mis4-367 pef1-as 1-NA-PP1	0.00453385	0.00519075	0.0192261	0.00427146	0.0203942	0.00456989	0.00266998	0.00503116	0.00399596	0.00471739	0.0130389	0.0123563
mis4+ DMSO	0.00991658	0.0127378	0.0364087	0.0187023	0.0318764	0.0132701	0.0113711	0.0252718	0.0179706	0.0091617	0.0171526	0.0171542
mis4-367 pef1-as DMSO / mis4+ DMSO	0.353568	0.252855	0.329748	0.202608	0.303808	0.346408	0.110463	0.0959194	0.144529	0.361189	0.438587	0.326403
mis4-367 pef1-as 1-NA-PP1 / mis4+ DMSO	0.457199	0.407507	0.528063	0.228392	0.639789	0.344376	0.234805	0.199082	0.22236	0.514904	0.760167	0.720304
%IP B
no tag DMSO	0.0006529	0.0006459	0.00088682	0.00539721	0.00081572	0.00071142	0.000558578	0.000795981	0.000670336	0.00180271	0.00150807	0.000546487
no tag 1-NA-PP1	0.00034828	0.000344448	0.00046832	0.000498287	0.000550267	0.000418388	0.000366439	0.000357851	0.00036409	0.000449202	0.000416834	0.00039952
mis4-367 DMSO	0.00188961	0.00252397	0.00768918	0.00364362	0.00782956	0.00251857	0.000989598	0.00137931	0.00156085	0.00210698	0.00401976	0.00304907
mis4-367 1-NA-PP1	0.00212	0.00264722	0.0105963	0.003827	0.0115161	0.00305071	0.00114182	0.00164075	0.00188272	0.00220121	0.00432155	0.00367403
mis4-367 pef1-as DMSO	0.0014327	0.00270661	0.00950481	0.0034613	0.00972371	0.00295788	0.00123521	0.0015722	0.00191026	0.00229276	0.00521881	0.00388058
mis4-367 pef1-as 1-NA-PP1	0.00336871	0.00494879	0.0188426	0.00585193	0.0219318	0.00421854	0.00255216	0.00400354	0.00387597	0.00423833	0.0119136	0.0111807
mis4+ DMSO	0.0127596	0.0115372	0.0309085	0.0188718	0.0362758	0.0129885	0.0112169	0.0247421	0.0171846	0.00908159	0.0162482	0.0193783
mis4-367 pef1-as DMSO / mis4+ DMSO	0.112284	0.234598	0.307514	0.183411	0.268049	0.22773	0.110121	0.0635433	0.111161	0.252462	0.321193	0.200254
mis4-367 pef1-as 1-NA-PP1 / mis4+ DMSO	0.264013	0.428941	0.609624	0.310088	0.604584	0.324789	0.227529	0.16181	0.225549	0.466695	0.733226	0.57697
%IP C
no tag DMSO	0.000299137	0.000223364	0.000349718	0.000161296	0.000365184	0.000229172	0.000234855	0.000257103	0.000274004	0.000399108	0.000376193	0.000305493
no tag 1-NA-PP1	0.000469343	0.000381694	0.000590121	0.00029924	0.000544193	0.000431029	0.000192971	0.000585355	0.000466932	0.000520256	0.000468859	0.000542869
mis4-367 DMSO	0.00215145	0.00242499	0.00819407	0.00230939	0.00571162	0.00223491	0.000835967	0.00138413	0.00170972	0.00218515	0.00425699	0.00347758
mis4-367 1-NA-PP1	0.00224228	0.00270698	0.0109538	0.003844	0.00983299	0.00294898	0.00111426	0.00160966	0.00189448	0.00261113	0.0049734	0.00459995
mis4-367 pef1-as DMSO	0.0019776	0.00271502	0.00819797	0.00253266	0.00704467	0.00264561	0.00121924	0.00172603	0.00191476	0.00222521	0.0046379	0.00364456
mis4-367 pef1-as 1-NA-PP1	0.00244364	0.00356491	0.0135378	0.00314903	0.0125899	0.00237278	0.00192205	0.00291443	0.0027979	0.00337177	0.0104363	0.00692793
mis4+ DMSO	0.0163174	0.0156789	0.0419527	0.0181191	0.0356177	0.0145297	0.0109543	0.025582	0.0211086	0.0105694	0.0186811	0.0231425
mis4-367 pef1-as DMSO / mis4+ DMSO	0.121196	0.173164	0.19541	0.139778	0.197786	0.182083	0.111303	0.0674706	0.0907099	0.210533	0.248266	0.157483
mis4-367 pef1-as 1-NA-PP1 / mis4+ DMSO	0.149757	0.227369	0.322692	0.173796	0.353474	0.163305	0.175462	0.113925	0.132548	0.319013	0.558653	0.299359
%IP D
no tag DMSO	0.000266452	0.00018443	0.000285133	0.000155596		0.000237717	0.00022075	0.000188319	0.000214236	0.000341383	0.000316149	0.000301893
no tag 1-NA-PP1	0.000227522	0.000182504	0.000294225	0.000222287		0.000256563	0.000191766	0.000233233	0.000242084	0.000301731	0.000267396	0.000257738
mis4-367 DMSO	0.00176429	0.0019793	0.00725346	0.0023531	0.00459096	0.00220715	0.000779835	0.00124963	0.00131302	0.00172823	0.00364994	0.00337393
mis4-367 1-NA-PP1	0.00190011	0.00233432	0.00885948	0.00244133	0.00673727	0.00229238	0.00114427	0.0014248	0.00150139	0.00209875	0.00366772	0.00355741
mis4-367 pef1-as DMSO	0.00168755	0.00228382	0.00790834	0.00171378	0.00594993	0.00225079	0.00118059	0.00141691	0.00168169	0.00206197	0.00452412	0.00381071
mis4-367 pef1-as 1-NA-PP1	0.00212369	0.00332871	0.0126376	0.00255848	0.0105871	0.00256761	0.00186492	0.00276315	0.00244354	0.00299941	0.00841706	0.00736865
mis4+ DMSO	0.0116315	0.0123088	0.0348904	0.0150378	0.0253672	0.0126011	0.0108971	0.0211379	0.0182427	0.00960864	0.0177097	0.0173372
mis4-367 pef1-as DMSO / mis4+ DMSO	0.145084	0.185545	0.226662	0.113965	0.234552	0.178619	0.10834	0.0670315	0.0921844	0.214595	0.25546	0.219799
mis4-367 pef1-as 1-NA-PP1 / mis4+ DMSO	0.18258	0.270434	0.362209	0.170136	0.417355	0.203761	0.17114	0.13072	0.133946	0.312157	0.475279	0.425018
Mean 4 ratios (Fig. 2C)
mis4-367 pef1-as DMSO / mis4+ DMSO	0.183033	0.21154	0.264834	0.159941	0.251049	0.23371	0.110057	0.0734912	0.109646	0.259695	0.315877	0.225985
mis4-367 pef1-as 1-NA-PP1 / mis4+ DMSO	0.263387	0.333563	0.455647	0.220603	0.5038	0.259058	0.202234	0.151384	0.178601	0.403192	0.631831	0.505413
SD
mis4-367 pef1-as DMSO / mis4+ DMSO	0.11453	0.038241	0.064063	0.0403802	0.0453934	0.0783941	0.00124749	0.015055	0.0250506	0.0702476	0.0881429	0.0718255
mis4-367 pef1-as 1-NA-PP1 / mis4+ DMSO	0.137847	0.0997111	0.135844	0.0653352	0.139906	0.089118	0.0335872	0.0374787	0.0523892	0.103095	0.137374	0.182775

## Sheet: t-test_Fig.2C
	438 dmso	tRNA-L dmso	imr2-L dmso	cc2 dmso	dg2-R dmso	tRNA-R dmso	1806 dmso	2898 dmso	3323 dmso	28S dmso	NTS dmso	Tel1-R dmso
mis4-367 pef1-as DMSO / mis4+ DMSO	0.353568	0.252855	0.329748	0.202608	0.303808	0.346408	0.110463	0.0959194	0.144529	0.361189	0.438587	0.326403
mis4-367 pef1-as DMSO / mis4+ DMSO	0.112284	0.234598	0.307514	0.183411	0.268049	0.22773	0.110121	0.0635433	0.111161	0.252462	0.321193	0.200254
mis4-367 pef1-as DMSO / mis4+ DMSO	0.121196	0.173164	0.19541	0.139778	0.197786	0.182083	0.111303	0.0674706	0.0907099	0.210533	0.248266	0.157483
mis4-367 pef1-as DMSO / mis4+ DMSO	0.145084	0.185545	0.226662	0.113965	0.234552	0.178619	0.10834	0.0670315	0.0921844	0.214595	0.25546	0.219799
	438 NA-PP1	tRNA-L NA-PP1	imr2-L NA-PP1	cc2 NA-PP1	dg2-R NA-PP1	tRNA-R NA-PP1	1806 NA-PP1	2898 NA-PP1	3323 NA-PP1	28S NA-PP1	NTS NA-PP1	Tel1-R NA-PP1
mis4-367 pef1-as 1-NA-PP1 / mis4+ DMSO	0.457199	0.407507	0.528063	0.228392	0.639789	0.344376	0.234805	0.199082	0.22236	0.514904	0.760167	0.720304
mis4-367 pef1-as 1-NA-PP1 / mis4+ DMSO	0.264013	0.428941	0.609624	0.310088	0.604584	0.324789	0.227529	0.16181	0.225549	0.466695	0.733226	0.57697
mis4-367 pef1-as 1-NA-PP1 / mis4+ DMSO	0.149757	0.227369	0.322692	0.173796	0.353474	0.163305	0.175462	0.113925	0.132548	0.319013	0.558653	0.299359
mis4-367 pef1-as 1-NA-PP1 / mis4+ DMSO	0.18258	0.270434	0.362209	0.170136	0.417355	0.203761	0.17114	0.13072	0.133946	0.312157	0.475279	0.425018
Unpaired t test dmso vs NA-PP1
P value	0.4073	0.0569	0.0478	0.1584	0.0136	0.7491	0.0012	0.0128	0.0579	0.0588	0.0077	0.029
P value summary	ns	ns	*	ns	*	ns	**	*	ns	ns	**	*
Are means signif. different? (P < 0.05)	No	No	Yes	No	Yes	No	Yes	Yes	No	No	Yes	Yes
One- or two-tailed P value?	Two-tailed	Two-tailed	Two-tailed	Two-tailed	Two-tailed	Two-tailed	Two-tailed	Two-tailed	Two-tailed	Two-tailed	Two-tailed	Two-tailed
