# Supplementary material for: The CDK Pef1 and protein phosphatase 4 oppose each other for regulating cohesin binding to fission yeast chromosomes
Source: eLife. 2020 Jan 2;9:e50556. doi: 10.7554/eLife.50556 (PMC6954021; doi:10.7554/eLife.50556)
Supplement: Figure 4—source data 1. [file elife-50556-fig4-data1.xlsx]

## Sheet: Fig.4B
Mis4-GFP ChIP cdc10-129	438	tRNA-L	imr2-L	cc2	dg2-R	tRNA-R	1806	2898	3323	28S	NTS	Tel1-R	ars 3004
pef1+ IPA	0.002521	0.00259774	0.00656711	0.0073963	0.00849185	0.00383052	0.00183966	0.00282249	0.00260452	0.00247065	0.00566486	0.00561831	0.00364978
pef1+ IPB	0.0020636	0.00219821	0.00532651	0.00638619	0.00645216	0.00345199	0.00168026	0.00254029	0.00247061	0.00291385	0.00549235	0.00506679	0.00232451
pef1+ IPC	0.0022076	0.00302163	0.00797104	0.00902831	0.00954744	0.00368613	0.00198822	0.00222199	0.00276725	0.00814971	0.0104781	0.00760506	0.00323752
pef1+ IPD	0.0024479	0.00184799	0.0066376	0.0092719	0.00751178	0.00319792	0.00157766	0.00188299	0.00226771	0.00651829	0.0076399	0.00687238	0.00283831
pef1D IPA	0.00378949	0.00590634	0.0134152	0.0133323	0.01719	0.0063562	0.00307674	0.00482982	0.0046028	0.00614777	0.0166393	0.0154062	0.00327478
pef1D IPB	0.00331239	0.00501196	0.0138757	0.0126096	0.0172462	0.00681626	0.00347518	0.00542877	0.00560532	0.00681549	0.019311	0.0147337	0.00252357
pef1D IPC	0.00301688	0.00356349	0.0127112	0.019502	0.014544	0.00481774	0.00254116	0.00427299	0.00378255	0.0107773	0.0194545	0.012825	0.00354139
pef1D IPD	0.00269936	0.00285295	0.0110045	0.0207929	0.0125215	0.00377363	0.00201735	0.00338517	0.00267777	0.00895462	0.0165686	0.0105288	0.00290957
Unpaired t test pef1+ vs pef1D
P value	0.0117	0.0359	0.0003	0.0084	0.0014	0.0371	0.0262	0.0038	0.0402	0.1177	0.0003	0.0013	0.8399
P value summary	*	*	***	**	**	*	*	**	*	ns	***	**	ns
Are means signif. different? (P < 0.05)	Yes	Yes	Yes	Yes	Yes	Yes	Yes	Yes	Yes	No	Yes	Yes	No
One- or two-tailed P value?	Two-tailed	Two-tailed	Two-tailed	Two-tailed	Two-tailed	Two-tailed	Two-tailed	Two-tailed	Two-tailed	Two-tailed	Two-tailed	Two-tailed	Two-tailed
Rad21-FLAG ChIP cdc10-129	438	tRNA-L	imr2-L	cc2	dg2-R	tRNA-R	1806	2898	3323	28S	NTS	Tel1-R	ars 3004
pef1+ IPA	0.0173338	0.0261004	0.118841	0.0541692	0.0741482	0.0336268	0.0224312	0.0246611	0.0296204	0.0353621	0.032448	0.119546	0.00531715
pef1+ IPB	0.017945	0.0292495	0.113475	0.0558778	0.0989029	0.0338375	0.0234475	0.0254025	0.0282087	0.0373149	0.0320047	0.0951288	0.0069276
pef1+ IPC	0.0229067	0.0256382	0.0913465	0.048736	0.0927415	0.0305317	0.0221097	0.0275957	0.02594	0.0346459	0.0319624	0.102702	0.00595988
pef1+ IPD	0.0237037	0.0203306	0.104657	0.0448964	0.0806032	0.0324585	0.0261198	0.0237858	0.0251157	0.0392025	0.0450295	0.10179	0.00705969
pef1D IPA	0.0314543	0.0431957	0.179824	0.106724	0.155162	0.0380152	0.0318586	0.0411738	0.0436815	0.0529585	0.117008	0.223881	0.00401234
pef1D IPB	0.0301769	0.0502919	0.174236	0.0971182	0.156377	0.0369438	0.0304839	0.0350938	0.0337771	0.0536004	0.0912537	0.195234	0.00341888
pef1D IPC	0.0251271	0.0378558	0.154202	0.0968947	0.167359	0.0394572	0.0365116	0.0400657	0.0397017	0.0536788	0.0924881	0.212134	0.00793096
pef1D IPD	0.0198343	0.0250871	0.125244	0.077685	0.137648	0.0373551	0.0380569	0.0334799	0.0337511	0.0573193	0.0924536	0.176503	0.00940237
Unpaired t test pef1+ vs pef1D	0.0959	0.0495	0.0097	0.0006	0.0002	0.2703	0.0018	0.001	0.0071	< 0.0001	0.0001	0.0002	0.9248
P value	ns	*	**	***	***	ns	**	**	**	***	***	***	ns
P value summary	No	Yes	Yes	Yes	Yes	No	Yes	Yes	Yes	Yes	Yes	Yes	No
Are means signif. different? (P < 0.05)	Two-tailed	Two-tailed	Two-tailed	Two-tailed	Two-tailed	Two-tailed	Two-tailed	Two-tailed	Two-tailed	Two-tailed	Two-tailed	Two-tailed	Two-tailed
One- or two-tailed P value?
Mis4-GFP ratios pef1D vs wt
IPA	1.50317	2.27365	2.04279	1.80257	2.0243	1.65935	1.67245	1.71119	1.76724	2.48832	2.93729	2.74215	0.897252
IPB	1.60515	2.28002	2.60503	1.97451	2.67293	1.97459	2.06824	2.13706	2.2688	2.33899	3.51598	2.90791	1.08563
IPC	1.36659	1.17933	1.59467	2.1601	1.52334	1.30699	1.27811	1.92305	1.3669	1.32242	1.85669	1.68637	1.09386
IPD	1.10273	1.54381	1.65791	2.24258	1.66691	1.18003	1.2787	1.79776	1.18083	1.37377	2.16869	1.53204	1.02511
Mis4-GFP Mean ratio pef1D vs wt	1.39441	1.8192	1.9751	2.04494	1.97187	1.53024	1.57437	1.89227	1.64594	1.88088	2.61966	2.21712	1.02546
SD	0.217634	0.548987	0.464301	0.19666	0.512644	0.358983	0.378029	0.184927	0.481961	0.618572	0.750506	0.708016	0.0908051
Rad21-FLAG ratios pef1D vs wt
IPA	1.81462	1.65498	1.51315	1.9702	2.09259	1.1305	1.42028	1.66959	1.47471	1.49761	3.60602	1.87276	0.754604
IPB	1.68163	1.71941	1.53546	1.73805	1.58111	1.0918	1.30009	1.38151	1.1974	1.43644	2.85126	2.05231	0.493516
IPC	1.09693	1.47654	1.6881	1.98816	1.80458	1.29233	1.65139	1.45188	1.53052	1.54935	2.89365	2.06553	1.33073
IPD	0.836758	1.23396	1.19671	1.73032	1.70772	1.15086	1.45701	1.40756	1.34382	1.46214	2.05318	1.73399	1.33184
Rad21-FLAG Mean ratio pef1D vs wt	1.35749	1.52122	1.48336	1.85668	1.7965	1.16637	1.45719	1.47763	1.38661	1.48638	2.85103	1.93115	0.977671
SD	0.466579	0.217321	0.206308	0.141675	0.217571	0.0874739	0.145778	0.131224	0.148439	0.0489002	0.634666	0.158134	0.421998

## Sheet: Fig.4C
Mis4-GFP ChIP cycling	438	tRNA-L	imr2-L	cc2	dg2-R	tRNA-R	1806	2898	3323	28S	NTS	Tel1-R
pef1+ IPA	0.00258313	0.00242552	0.00486574	0.00993506	0.00466084	0.00283114	0.00273967	0.00195038	0.00293352	0.00416186	0.00483673	0.00589737
pef1+ IPB	0.00243473	0.00207119	0.00510176	0.00967316	0.00428986	0.00258257	0.00261845	0.00187545	0.00292211	0.00383171	0.00492122	0.00600868
pef1+ IPC	0.00322838	0.00306005	0.00715869	0.0125381	0.00700843	0.00365287	0.00402105	0.00263574	0.00411818	0.00347009	0.006263	0.00769491
pef1+ IPD	0.00338561	0.00313472	0.00797392	0.0128304	0.00719203	0.00352052	0.00379865	0.00294675	0.00385233	0.00342162	0.0055514	0.00833469
pef1D IPA	0.00250105	0.00296902	0.00936017	0.0147402	0.00772349	0.00325264	0.00285722		0.00303908	0.00475423	0.0108747	0.0111971
pef1D IPB	0.00269587	0.00303963	0.0108483	0.0135244	0.00750649	0.00354666	0.00275012	0.00249879	0.00318342	0.00476246	0.01139	0.0114882
pef1D IPC	0.00254725	0.00302717	0.0121481	0.0160229	0.007725	0.00347661	0.00283544	0.00266644	0.00333667	0.00574603	0.0106674	0.00940421
pef1D IPC	0.0018227	0.00282704	0.00934737	0.0137808	0.00655582	0.0026225	0.00205912	0.00208095	0.0027993	0.00444476	0.00926512	0.00890743
Unpaired t test pef1+ vs pef1D
P value	0.1405	0.3271	0.0068	0.0168	0.0966	0.8333	0.1764	0.8048	0.3108	0.0107	< 0.0001	0.0101
P value summary	ns	ns	**	*	ns	ns	ns	ns	ns	*	***	*
Are means signif. different? (P < 0.05)	No	No	Yes	Yes	No	No	No	No	No	Yes	Yes	Yes
One- or two-tailed P value?	Two-tailed	Two-tailed	Two-tailed	Two-tailed	Two-tailed	Two-tailed	Two-tailed	Two-tailed	Two-tailed	Two-tailed	Two-tailed	Two-tailed
Rad21-FLAG ChIP cycling
pef1+ IPA	0.00616832	0.0144266	0.0342922	0.0214569	0.0342719	0.0153921	0.00980458	0.00982239	0.0122517	0.0190905	0.0189343	0.0457298
pef1+ IPB	0.00616749	0.0135339	0.0375678	0.0209592	0.0303673	0.0167493	0.00945279	0.00836451	0.0132248	0.018367	0.0180875	0.0440238
pef1+ IPC	0.00760682	0.0115575	0.0421433	0.0228663	0.0320494	0.0189271	0.00973795	0.0080178	0.0121867	0.0247199	0.0181886	0.0416999
pef1+ IPD	0.00761052	0.0116419	0.0325005	0.0162082	0.0285114	0.0175541	0.00888843	0.00934374	0.0130202	0.0230299	0.0152506	0.0391291
pef1D IPA	0.00459153	0.00996997	0.0506908	0.0186994	0.0421521	0.010366	0.00901452	0.00906756	0.0104201	0.0118387	0.0221182	0.0484828
pef1D IPB	0.00423414	0.00999825	0.0471199	0.019711	0.0396313	0.0104441	0.00850554	0.00802465	0.0102627	0.0124785	0.0248042	0.0516229
pef1D IPC	0.0066698	0.0124038	0.0527622	0.0190439	0.050036	0.0162361	0.0117652	0.0128027	0.0117541	0.0178818	0.0249677	0.0554577
pef1D IPC	0.00613289	0.0122495	0.0513762	0.016056	0.0512839	0.0143903	0.0115136	0.0130514	0.00956188	0.0168502	0.0204955	0.0541153
Unpaired t test pef1+ vs pef1D
P value	0.0823	0.1441	0.0013	0.2671	0.0036	0.0392	0.4362	0.2158	0.0063	0.0234	0.0067	0.0035
P value summary	ns	ns	**	ns	**	*	ns	ns	**	*	**	**
Are means signif. different? (P < 0.05)	No	No	Yes	No	Yes	Yes	No	No	Yes	Yes	Yes	Yes
One- or two-tailed P value?	Two-tailed	Two-tailed	Two-tailed	Two-tailed	Two-tailed	Two-tailed	Two-tailed	Two-tailed	Two-tailed	Two-tailed	Two-tailed	Two-tailed
Mis4-GFP ratios pef1D vs wt
IPA	0.968226	1.22408	1.92369	1.48366	1.6571	1.14888	1.04291		1.03598	1.14233	2.24836	1.89866
IPB	1.10726	1.46758	2.12638	1.39813	1.74982	1.37331	1.05029	1.33237	1.08942	1.24291	2.31447	1.91193
IPC	0.789017	0.989253	1.69697	1.27794	1.10224	0.951749	0.705149	1.01165	0.810229	1.65588	1.70324	1.22213
IPD	0.538368	0.901846	1.17224	1.07408	0.91154	0.744919	0.542066	0.706185	0.726652	1.29902	1.66897	1.06872
Mis4-GFP Mean ratio pef1D vs wt	0.850717	1.14569	1.72982	1.30845	1.35518	1.05471	0.835102	1.01673	0.915571	1.33503	1.98376	1.52536
SD	0.245622	0.254093	0.411023	0.177576	0.411376	0.268915	0.253143	0.313124	0.174653	0.2235	0.345042	0.443194
Rad21-FLAG ratios pef1D vs wt
IPA	0.744372	0.691084	1.4782	0.871487	1.22993	0.673465	0.919419	0.923152	0.850497	0.620133	1.16815	1.0602
IPB	0.686526	0.738756	1.25426	0.940443	1.30507	0.623558	0.899792	0.959368	0.776018	0.6794	1.37134	1.17261
IPC	0.876819	1.07322	1.25197	0.832836	1.56121	0.857824	1.20818	1.59679	0.964503	0.723379	1.37271	1.32992
IPD	0.805844	1.05219	1.58078	0.99061	1.79871	0.819769	1.29535	1.3968	0.73439	0.731669	1.34391	1.383
Rad21-FLAG Mean ratio pef1D vs wt	0.77839	0.888814	1.39131	0.908844	1.47373	0.743654	1.08068	1.21903	0.831352	0.688645	1.31403	1.23643
SD	0.0817276	0.201919	0.16497	0.0703729	0.258942	0.112809	0.200885	0.331297	0.100928	0.0511107	0.0981511	0.147594
