# Supplementary material for: The CDK Pef1 and protein phosphatase 4 oppose each other for regulating cohesin binding to fission yeast chromosomes
Source: eLife. 2020 Jan 2;9:e50556. doi: 10.7554/eLife.50556 (PMC6954021; doi:10.7554/eLife.50556)
Supplement: Figure 6—source data 1. [file elife-50556-fig6-data1.xlsx]

## Sheet: Fig.6B
	438	tRNA-L	Imr2-L	cc2	dg2-R	tRNA-R	1806	2898	3323	28S	NTS	Tel1-R
wt
IPA	0.00359646	0.00432932	0.00895272	0.00885226	0.00818958	0.00476059	0.00216123	0.00361523	0.00315053	0.00826928	0.0114598	0.0088746
IPB	0.00356632	0.00399119	0.00794777	0.00898771	0.00911524	0.00572683	0.00222466	0.00418494	0.00341033	0.00729047	0.0108277	0.00828221
IPC	0.00291194	0.00333668	0.00687176	0.00852559	0.00841377	0.00459364	0.0020705	0.00276487	0.00321102	0.00671505	0.00879222	0.00741015
IPD	0.0028624	0.0029552	0.00654896	0.00726384	0.00674739	0.00372369	0.00189318	0.00242914	0.00291065	0.0065332	0.00745043	0.00567403
pef1D
IPA	0.00409648	0.00629464	0.0176794	0.0193816	0.0215044	0.00733592	0.00306188	0.00574946	0.00459785	0.0117284	0.0311312	0.0224956
IPB	0.00368621	0.00660599	0.0181402	0.0192033	0.0222551	0.00652362	0.00273952	0.00612957	0.00495686	0.0111669	0.031666	0.0197955
IPC	0.00359549	0.00648682	0.0154067	0.0191956	0.018016	0.0065064	0.00303681	0.00566246	0.00430243	0.0134332	0.0271266	0.0196204
IPD	0.00383119	0.00640381	0.0151192	0.0189824	0.0161188	0.0066557	0.00310726	0.00586189	0.00428727	0.0116451	0.0256274	0.018242
rad21-T262A
IPA	0.00262222	0.00516808	0.0114178	0.0116541	0.0131907	0.0050226	0.00210143	0.00278061	0.00289446	0.00673379	0.00901609	0.0115756
IPB	0.00279224	0.00494249	0.0111749	0.0113897	0.0137211	0.00516684	0.00243061	0.00402168	0.00336603	0.00626284	0.00909669	0.0124149
IPC	0.00257627	0.00458538	0.0106161	0.00976019	0.0114534	0.00509931	0.00177394	0.0029494	0.00271778	0.00624041	0.00802184	0.0124284
IPD	0.0021811	0.00354334	0.00823123	0.0094778	0.00924756	0.00373037	0.00167799	0.00231414	0.00242308	0.00463436	0.0064423	0.0104495
rad21-T262A pef1D
IPA	0.0047198	0.00721986	0.0219577	0.0284569	0.0241325	0.00796487	0.00357753	0.00745413	0.00577588	0.0194964	0.0379382	0.0232681
IPB	0.00374046	0.00620619	0.0155827	0.0218326	0.016389	0.00639827	0.00289379	0.00623192	0.00387772	0.013171	0.0253845	0.0196402
IPC	0.00386231	0.00726435	0.0171042	0.0177626	0.0227677	0.0065065	0.00299903	0.00591844	0.00494329	0.0104512	0.0268153	0.018
IPD	0.00362716	0.00637362	0.0138228	0.0190026	0.0185217	0.00551265	0.00276855	0.00535155	0.00443773	0.00800331	0.017816	0.0161338
Ratios vs wild-type
pef1D
IPA	1.13903	1.45396	1.97476	2.18945	2.62582	1.54097	1.41673	1.59035	1.45939	1.41831	2.71655	2.53482
IPB	1.03362	1.65514	2.28242	2.13662	2.44153	1.13913	1.23143	1.46468	1.45348	1.53171	2.92454	2.39013
IPC	1.23474	1.94409	2.24203	2.25153	2.14125	1.41639	1.4667	2.048	1.33989	2.00046	3.0853	2.64777
IPD	1.33845	2.16696	2.30864	2.61327	2.3889	1.78739	1.64129	2.41315	1.47296	1.78245	3.43972	3.21499
rad21-T262A
IPA	0.729112	1.19374	1.27535	1.31651	1.61067	1.05504	0.972332	0.769139	0.918723	0.814314	0.786757	1.30436
IPB	0.782947	1.23835	1.40604	1.26726	1.5053	0.902216	1.09258	0.96099	0.987007	0.859045	0.840134	1.49899
IPC	0.884729	1.37423	1.5449	1.14481	1.36127	1.11008	0.856766	1.06674	0.84639	0.929317	0.91238	1.67722
IPD	0.761985	1.19902	1.25688	1.30479	1.37054	1.00179	0.886336	0.952656	0.83249	0.709355	0.864688	1.84164
rad21-T262A pef1D
IPA	1.31235	1.66767	2.45263	3.21465	2.94673	1.67308	1.65532	2.06187	1.83331	2.3577	3.31054	2.62187
IPB	1.04883	1.55497	1.96064	2.42916	1.79797	1.11725	1.30078	1.48913	1.13705	1.8066	2.34441	2.37137
IPC	1.32637	2.17712	2.48906	2.08344	2.70601	1.41642	1.44846	2.14058	1.53947	1.55638	3.04989	2.4291
IPD	1.26717	2.15674	2.11069	2.61606	2.74502	1.48043	1.46238	2.20306	1.52466	1.22502	2.39127	2.84345
Mean ratios
pef1D	1.18646	1.80504	2.20196	2.29772	2.39937	1.47097	1.43904	1.87904	1.43143	1.68323	3.04153	2.69693
rad21-T262A	0.789693	1.25134	1.37079	1.25834	1.46194	1.01728	0.952003	0.937382	0.896153	0.828008	0.85099	1.58055
rad21-T262A pef1D	1.23868	1.88913	2.25325	2.58583	2.54893	1.42179	1.46673	1.97366	1.50862	1.73643	2.77403	2.56645
SD
pef1D	0.130441	0.314141	0.153927	0.215548	0.199829	0.269641	0.168591	0.435455	0.0615687	0.260526	0.305379	0.361115
rad21-T262A	0.0671199	0.0843151	0.133717	0.0785502	0.119008	0.0885377	0.105761	0.123599	0.0713987	0.0921824	0.0522816	0.231264
rad21-T262A pef1D	0.129063	0.324173	0.259038	0.473733	0.511633	0.23048	0.145442	0.328145	0.285596	0.477791	0.481323	0.213482

## Sheet: Fig.6B t-test
	438	tRNA-L	Imr2-L	cc2	dg2-R	tRNA-R	1806	2898	3323	28S	NTS	Tel1-R
wt
IPA	0.00359646	0.00432932	0.00895272	0.00885226	0.00818958	0.00476059	0.00216123	0.00361523	0.00315053	0.00826928	0.0114598	0.0088746
IPB	0.00356632	0.00399119	0.00794777	0.00898771	0.00911524	0.00572683	0.00222466	0.00418494	0.00341033	0.00729047	0.0108277	0.00828221
IPC	0.00291194	0.00333668	0.00687176	0.00852559	0.00841377	0.00459364	0.0020705	0.00276487	0.00321102	0.00671505	0.00879222	0.00741015
IPD	0.0028624	0.0029552	0.00654896	0.00726384	0.00674739	0.00372369	0.00189318	0.00242914	0.00291065	0.0065332	0.00745043	0.00567403
rad21-T262A
IPA	0.00262222	0.00516808	0.0114178	0.0116541	0.0131907	0.0050226	0.00210143	0.00278061	0.00289446	0.00673379	0.00901609	0.0115756
IPB	0.00279224	0.00494249	0.0111749	0.0113897	0.0137211	0.00516684	0.00243061	0.00402168	0.00336603	0.00626284	0.00909669	0.0124149
IPC	0.00257627	0.00458538	0.0106161	0.00976019	0.0114534	0.00509931	0.00177394	0.0029494	0.00271778	0.00624041	0.00802184	0.0124284
IPD	0.0021811	0.00354334	0.00823123	0.0094778	0.00924756	0.00373037	0.00167799	0.00231414	0.00242308	0.00463436	0.0064423	0.0104495
Unpaired t test
P value	0.0259	0.1086	0.024	0.0185	0.0154	0.9294	0.5847	0.6593	0.2144	0.0881	0.2188	0.0027
P value summary	*	ns	*	*	*	ns	ns	ns	ns	ns	ns	**
Are means signif. different? (P < 0.05)	Yes	No	Yes	Yes	Yes	No	No	No	No	No	No	Yes
One- or two-tailed P value?	Two-tailed	Two-tailed	Two-tailed	Two-tailed	Two-tailed	Two-tailed	Two-tailed	Two-tailed	Two-tailed	Two-tailed	Two-tailed	Two-tailed

## Sheet: Fig.6C
	438	tRNA-L	Imr2-L	cc2	dg2-R	tRNA-R	1806	2898	3323	28S	NTS	Tel1-R
wt
IPA	0.00233903	0.00248532	0.00546425	0.00640672	0.0073776	0.00320819	0.00187934	0.00252812	0.00271975	0.00299038	0.00631315	0.00592391
IPB	0.00283745	0.00257761	0.00691966	0.0086013	0.00827863	0.00428971	0.00269533	0.00356419	0.00332732	0.00274996	0.00726872	0.00714388
IPC	0.00253374	0.00229117	0.00537109	0.00581125	0.00601727	0.0031405	0.00187934	0.00272908	0.0022556	0.00362662	0.00558669	0.00569955
IPD	0.00238484	0.00216358	0.004951	0.00606763	0.00588453	0.00249624	0.00182306	0.00223584	0.00241727	0.00419342	0.00556322	0.00534736
pef1D
IPA	0.00368894	0.00517495	0.0142221	0.0159372	0.0132899	0.00500027	0.00275	0.00446838	0.00431127	0.00454417	0.0200864	0.0119331
IPB	0.00317621	0.00565379	0.013554	0.0140279	0.0142639	0.00621264	0.0032339	0.00487686	0.00434324	0.00434936	0.0182638	0.0122634
IPC	0.0041131	0.00532667	0.0137101	0.0137947	0.0155244	0.00533479	0.00275	0.00610376	0.00451789	0.00699445	0.0200712	0.0138193
IPD	0.00352707	0.00476975	0.0115211	0.0176042	0.0133275	0.0046477	0.0029443	0.00484734	0.00367551	0.00615074	0.0163857	0.0120894
rad21-T262E
IPA	0.00199494	0.0025024	0.00632256	0.0106874	0.00628126	0.0030521	0.00186716	0.00224764	0.00189718	0.00305072	0.00656445	0.00501744
IPB	0.00292296	0.00266845	0.00893355	0.00863502	0.00689298	0.00290822	0.00266614	0.00309697	0.00233912	0.00288274	0.00701073	0.00635051
IPC	0.0018664	0.00207489	0.00499508	0.00733762	0.00639915	0.00293771	0.00186716	0.00257182	0.00246484	0.00309275	0.00563331	0.00475631
IPD	0.00147564	0.0016826	0.00429685	0.00546075	0.00544797	0.00232794	0.00143568	0.00201064	0.00191453	0.00224588	0.00463897	0.00435731
rad21-T262E pef1D
IPA	0.00256434	0.00327785	0.00779887	0.00700665	0.00898172	0.00418182	0.002223	0.00332134	0.00305717	0.00375182	0.0165266	0.00902558
IPB	0.00295346	0.00295121	0.00762896	0.0132867	0.00902058	0.00446035	0.00221932	0.00319788	0.00284949	0.00449322	0.0150591	0.00801993
IPC	0.00354688	0.00333301	0.00922006	0.0108677	0.0104792	0.00437254	0.002223	0.00429556	0.00392982	0.00638924	0.0147848	0.00959212
IPD	0.00311484	0.00297576	0.00682963	0.00917415	0.00819348	0.00363246	0.00257228	0.00377571	0.00290077	0.00469142	0.0115488	0.00772899
Ratios vs wild-type
pef1D
IPA	1.57713	2.0822	2.60276	2.48758	1.80139	1.5586	1.46328	1.76747	1.58517	1.5196	3.18168	2.0144
IPB	1.11939	2.19343	1.95876	1.6309	1.72298	1.44827	1.19982	1.3683	1.30533	1.5816	2.51266	1.71663
IPC	1.62333	2.32487	2.55257	2.37379	2.57998	1.69871	1.46328	2.23657	2.00297	1.92864	3.59268	2.42463
IPD	1.47895	2.20457	2.32702	2.90133	2.26484	1.86188	1.61503	2.16801	1.52052	1.46676	2.94535	2.26082
rad21-T262E
IPA	0.852894	1.00687	1.15708	1.66816	0.851396	0.951348	0.993522	0.889055	0.697559	1.02018	1.03981	0.846981
IPB	1.03014	1.03525	1.29104	1.00392	0.832623	0.677951	0.98917	0.868913	0.703004	1.04828	0.964507	0.888943
IPC	0.736616	0.905606	0.929994	1.26266	1.06346	0.93543	0.993522	0.942377	1.09277	0.85279	1.00834	0.834506
IPD	0.618759	0.777696	0.867874	0.899981	0.925812	0.932577	0.787514	0.899277	0.792024	0.535572	0.833863	0.814853
rad21-T262E pef1D
IPA	1.09633	1.31888	1.42725	1.09364	1.21743	1.30348	1.18286	1.31376	1.12406	1.25463	2.61781	1.52358
IPB	1.04089	1.14494	1.1025	1.54473	1.08962	1.03978	0.823395	0.897226	0.856393	1.63392	2.07177	1.12263
IPC	1.39986	1.45472	1.71661	1.87012	1.74153	1.39231	1.18286	1.574	1.74225	1.76176	2.64644	1.68296
IPD	1.3061	1.37539	1.37944	1.51198	1.39238	1.45517	1.41097	1.68872	1.20002	1.11876	2.07592	1.44538
Mean ratios
pef1D	1.4497	2.20127	2.36028	2.3484	2.0923	1.64186	1.43535	1.88509	1.6035	1.62415	3.05809	2.10412
rad21-T262E	0.809601	0.931354	1.0615	1.20868	0.918324	0.874327	0.940932	0.899906	0.821338	0.864205	0.96163	0.846321
rad21-T262E pef1D	1.21079	1.32348	1.40645	1.50512	1.36024	1.29769	1.15002	1.36843	1.23068	1.44227	2.35298	1.44364
SD
pef1D	0.228287	0.0992083	0.293312	0.529326	0.40358	0.178933	0.17255	0.401868	0.291949	0.208349	0.45139	0.308478
rad21-T262E	0.175364	0.116576	0.197153	0.342178	0.104795	0.131177	0.102299	0.0309974	0.186061	0.235472	0.0906022	0.0313419
rad21-T262E pef1D	0.170097	0.131424	0.251491	0.318411	0.282867	0.182853	0.242855	0.351124	0.371531	0.30478	0.32254	0.235737

## Sheet: Fig.6C t-test
	438	tRNA-L	Imr2-L	cc2	dg2-R	tRNA-R	1806	2898	3323	28S	NTS	Tel1-R
pef1D
IPA	0.00368894	0.00517495	0.0142221	0.0159372	0.0132899	0.00500027	0.00275	0.00446838	0.00431127	0.00454417	0.0200864	0.0119331
IPB	0.00317621	0.00565379	0.013554	0.0140279	0.0142639	0.00621264	0.0032339	0.00487686	0.00434324	0.00434936	0.0182638	0.0122634
IPC	0.0041131	0.00532667	0.0137101	0.0137947	0.0155244	0.00533479	0.00275	0.00610376	0.00451789	0.00699445	0.0200712	0.0138193
IPD	0.00352707	0.00476975	0.0115211	0.0176042	0.0133275	0.0046477	0.0029443	0.00484734	0.00367551	0.00615074	0.0163857	0.0120894
pef1D rad21-T262E
IPA	0.00256434	0.00327785	0.00779887	0.00700665	0.00898172	0.00418182	0.002223	0.00332134	0.00305717	0.00375182	0.0165266	0.00902558
IPB	0.00295346	0.00295121	0.00762896	0.0132867	0.00902058	0.00446035	0.00221932	0.00319788	0.00284949	0.00449322	0.0150591	0.00801993
IPC	0.00354688	0.00333301	0.00922006	0.0108677	0.0104792	0.00437254	0.002223	0.00429556	0.00392982	0.00638924	0.0147848	0.00959212
IPD	0.00311484	0.00297576	0.00682963	0.00917415	0.00819348	0.00363246	0.00257228	0.00377571	0.00290077	0.00469142	0.0115488	0.00772899
Unpaired t test
P value	0.0724	< 0.0001	0.0004	0.0173	0.0004	0.0319	0.0039	0.0167	0.015	0.4773	0.0216	0.0007
P value summary	ns	***	***	*	***	*	**	*	*	ns	*	***
Are means signif. different? (P < 0.05)	No	Yes	Yes	Yes	Yes	Yes	Yes	Yes	Yes	No	Yes	Yes
One- or two-tailed P value?	Two-tailed	Two-tailed	Two-tailed	Two-tailed	Two-tailed	Two-tailed	Two-tailed	Two-tailed	Two-tailed	Two-tailed	Two-tailed	Two-tailed
