# Supplementary material for: The CDK Pef1 and protein phosphatase 4 oppose each other for regulating cohesin binding to fission yeast chromosomes
Source: eLife. 2020 Jan 2;9:e50556. doi: 10.7554/eLife.50556 (PMC6954021; doi:10.7554/eLife.50556)
Supplement: Figure 7—source data 1. [file elife-50556-fig7-data1.xlsx]

## Sheet: Fig.7C data
Enrichment relative to wt	438	tRNA-L	Imr2-L	cc2	dg2-R	tRNA-R	1806	2898	3323	28S	NTS	Tel1-R
psm3NN IPA	0.519555	0.423848	0.398906	0.494617	0.376874	0.362779	0.278229	0.243475	0.395127	0.747064	0.876632	0.410472
psm3NN IPB	0.514676	0.412032	0.424269	0.446987	0.403987	0.337324	0.331294	0.275443	0.385901	0.713411	0.925392	0.462613
psm3NN IPC	0.679295	0.523546	0.583867	0.609051	0.536223	0.494739	0.377765	0.444027	0.620052	0.953933	1.21307	0.556513
psm3NN IPD	0.619181	0.479006	0.538742	0.580675	0.467631	0.503679	0.337032	0.44245	0.550467	1.04315	1.15927	0.516163
psm3NN pef1D IPA	0.638356	0.914373	0.762635	0.830718	0.989443	0.624146	0.959977	0.866699	0.614097	1.24931	1.72163	1.05545
psm3NN pef1D IPB	0.644068	0.858061	0.775555	0.853767	1.05934	0.657915	0.964806	0.840453	0.695933	1.18078	1.86668	0.988988
psm3NN pef1D IPC	0.966743	1.15008	1.26112	0.923479	1.39711	0.848652	1.1136	1.03756	1.01338	2.04551	2.55005	1.26811
psm3NN pef1D IPD	0.898517	1.08485	1.06792	0.772273	1.16214	0.827112	1.05912	1.15557	0.996963	1.90271	2.23957	1.10947
psm3NN pph3D IPA	0.182876	0.173752	0.136568	0.172518	0.162424	0.134214	0.0866703	0.0837339	0.0851489	0.327959	0.386792	0.144279
psm3NN pph3D IPB	0.211759	0.170031	0.121212	0.174852	0.139506	0.150407	0.0901965	0.0832294	0.0805225	0.353293	0.410522	0.153414
psm3NN pph3D IPC	0.175037	0.163449	0.137004	0.198279	0.126661	0.152299	0.084289	0.0973604	0.0774887	0.431079	0.495914	0.159028
psm3NN pph3D IPD	0.172134	0.146982	0.120147	0.190133	0.118395	0.142995	0.0703518	0.0767978	0.0697411	0.326866	0.42107	0.109489
psm3NN pph3D rad21-T262A IPA	0.286793	0.257916	0.305481	0.238161	0.330909	0.22915	0.198056	0.205137	0.209137	0.652422	0.802892	0.281924
psm3NN pph3D rad21-T262A IPB	0.334594	0.266402	0.255411	0.244731	0.298765	0.239045	0.262475	0.212951	0.226535	0.728051	0.791407	0.282507
psm3NN pph3D rad21-T262A IPC	0.287418	0.319457	0.306018	0.25974	0.333038	0.329686	0.235733	0.24837	0.217084	0.888038	0.839632	0.335417
psm3NN pph3D rad21-T262A IPD	0.264063	0.269684	0.301832	0.284071	0.294521	0.270772	0.198287	0.220864	0.221073	0.711762	0.763921	0.353285
psm3NN pph3D pef1D IPA	0.413585	0.753683	0.758311	0.513837	0.928485	0.442337	0.51544	0.553843	0.347362	1.44724	1.98739	0.741294
psm3NN pph3D pef1D IPB	0.434101	0.695542	0.575758	0.489304	0.822222	0.378703	0.57882	0.498519	0.38422	1.69987	1.90348	0.76333
psm3NN pph3D pef1D IPC	0.452374	0.762082	0.627401	0.562151	0.930027	0.5757	0.620518	0.728454	0.410252	1.93535	1.78403	0.790972
psm3NN pph3D pef1D IPD	0.459978	0.775076	0.715018	0.650568	0.899217	0.532902	0.606225	0.628292	0.391932	1.69878	1.96846	0.725547
psm3NN pph3D pef1D rad21-T262A IPA	0.490362	0.605741	0.842767	0.431575	1.11758	0.484017	0.673354	0.746897	0.401777	1.72228	1.82543	0.855721
psm3NN pph3D pef1D rad21-T262A IPB	0.72603	0.691039	0.794805	0.55329	1.17407	0.682586	0.780067	0.733844	0.516544	1.98959	2.33127	1.03274
psm3NN pph3D pef1D rad21-T262A IPC	0.440994	0.836489	0.683099	0.464074	0.874225	0.58243	0.584101	0.681493	0.398528	1.9262	1.70196	0.715972
psm3NN pph3D pef1D rad21-T262A IPD	0.446487	0.72734	0.644689	0.576513	0.791585	0.46233	0.532015	0.551475	0.307121	1.48069	1.42532	0.662044
Mean enrichment relative to wt
psm3NN	0.583177	0.459608	0.486446	0.532833	0.446179	0.424631	0.33108	0.351349	0.487887	0.864389	1.04359	0.48644
psm3NN pef1D	0.786921	1.00184	0.966809	0.845059	1.15201	0.739456	1.02438	0.975071	0.830092	1.59458	2.09449	1.1055
psm3NN pph3D	0.185452	0.163554	0.128733	0.183946	0.136747	0.144979	0.0828769	0.0852804	0.0782253	0.359799	0.428574	0.141552
psm3NN pph3D rad21-T262A	0.293217	0.278365	0.292185	0.256676	0.314308	0.267163	0.223638	0.22183	0.218457	0.745068	0.799463	0.313283
psm3NN pph3D pef1D	0.44001	0.746596	0.669122	0.553965	0.894988	0.482411	0.580251	0.602277	0.383442	1.69531	1.91084	0.755286
psm3NN pph3D pef1D rad21-T262A	0.525968	0.715152	0.74134	0.506363	0.989365	0.552841	0.642384	0.678427	0.405993	1.77969	1.821	0.81662
SD
psm3NN	0.0801564	0.0516615	0.088985	0.075118	0.0710668	0.0868176	0.0408582	0.106907	0.116031	0.159721	0.167281	0.0635936
psm3NN pef1D	0.170556	0.138067	0.241599	0.0625273	0.178132	0.114823	0.0749742	0.148719	0.205013	0.442991	0.373946	0.119077
psm3NN pph3D	0.0181154	0.0118408	0.00931097	0.0123426	0.0191959	0.00822327	0.00869556	0.0086502	0.006474	0.0490629	0.0471258	0.022223
psm3NN pph3D rad21-T262A	0.0296475	0.0278399	0.0245865	0.0203747	0.0204901	0.0453054	0.0313672	0.0188218	0.00732208	0.100702	0.0313763	0.0366087
psm3NN pph3D pef1D	0.0206944	0.0351551	0.0827017	0.071158	0.0505387	0.0887196	0.0465424	0.0995142	0.0264147	0.199324	0.0918623	0.0283924
psm3NN pph3D pef1D rad21-T262A	0.135192	0.0956094	0.0928791	0.0695336	0.185229	0.101058	0.108772	0.089229	0.0857724	0.22965	0.379092	0.165591

## Sheet: Fig.S7A t-tests
Enrichment relative to wt	438	tRNA-L	Imr2-L	cc2	dg2-R	tRNA-R	1806	2898	3323	28S	NTS	Tel1-R
psm3NN IPA	0.519555	0.423848	0.398906	0.494617	0.376874	0.362779	0.278229	0.243475	0.395127	0.747064	0.876632	0.410472
psm3NN IPB	0.514676	0.412032	0.424269	0.446987	0.403987	0.337324	0.331294	0.275443	0.385901	0.713411	0.925392	0.462613
psm3NN IPC	0.679295	0.523546	0.583867	0.609051	0.536223	0.494739	0.377765	0.444027	0.620052	0.953933	1.21307	0.556513
psm3NN IPD	0.619181	0.479006	0.538742	0.580675	0.467631	0.503679	0.337032	0.44245	0.550467	1.04315	1.15927	0.516163
psm3NN pef1D IPA	0.638356	0.914373	0.762635	0.830718	0.989443	0.624146	0.959977	0.866699	0.614097	1.24931	1.72163	1.05545
psm3NN pef1D IPB	0.644068	0.858061	0.775555	0.853767	1.05934	0.657915	0.964806	0.840453	0.695933	1.18078	1.86668	0.988988
psm3NN pef1D IPC	0.966743	1.15008	1.26112	0.923479	1.39711	0.848652	1.1136	1.03756	1.01338	2.04551	2.55005	1.26811
psm3NN pef1D IPD	0.898517	1.08485	1.06792	0.772273	1.16214	0.827112	1.05912	1.15557	0.996963	1.90271	2.23957	1.10947
psm3NN pph3D IPA	0.182876	0.173752	0.136568	0.172518	0.162424	0.134214	0.0866703	0.0837339	0.0851489	0.327959	0.386792	0.144279
psm3NN pph3D IPB	0.211759	0.170031	0.121212	0.174852	0.139506	0.150407	0.0901965	0.0832294	0.0805225	0.353293	0.410522	0.153414
psm3NN pph3D IPC	0.175037	0.163449	0.137004	0.198279	0.126661	0.152299	0.084289	0.0973604	0.0774887	0.431079	0.495914	0.159028
psm3NN pph3D IPD	0.172134	0.146982	0.120147	0.190133	0.118395	0.142995	0.0703518	0.0767978	0.0697411	0.326866	0.42107	0.109489
t-test of NN vs psm3NN pef1D
Unpaired t test
P value	0.0756	0.0003	0.0094	0.0007	0.0003	0.0045	< 0.0001	0.0005	0.0274	0.0209	0.0021	< 0.0001
P value summary	ns	***	**	***	***	**	***	***	*	*	**	***
Are means signif. different? (P < 0.05)	No	Yes	Yes	Yes	Yes	Yes	Yes	Yes	Yes	Yes	Yes	Yes
One- or two-tailed P value?	Two-tailed	Two-tailed	Two-tailed	Two-tailed	Two-tailed	Two-tailed	Two-tailed	Two-tailed	Two-tailed	Two-tailed	Two-tailed	Two-tailed
t-test of NN vs psm3NN pph3D
Unpaired t test	< 0.0001	< 0.0001	0.0002	< 0.0001	0.0002	0.0006	< 0.0001	0.0024	0.0004	0.0009	0.0004	< 0.0001
P value	***	***	***	***	***	***	***	**	***	***	***	***
P value summary	Yes	Yes	Yes	Yes	Yes	Yes	Yes	Yes	Yes	Yes	Yes	Yes
Are means signif. different? (P < 0.05)	Two-tailed	Two-tailed	Two-tailed	Two-tailed	Two-tailed	Two-tailed	Two-tailed	Two-tailed	Two-tailed	Two-tailed	Two-tailed	Two-tailed
One- or two-tailed P value?

## Sheet: Fig.S7B t-tests
Enrichment relative to wt	438	tRNA-L	Imr2-L	cc2	dg2-R	tRNA-R	1806	2898	3323	28S	NTS	Tel1-R
psm3NN pph3D IPA	0.182876	0.173752	0.136568	0.172518	0.162424	0.134214	0.0866703	0.0837339	0.0851489	0.327959	0.386792	0.144279
psm3NN pph3D IPB	0.211759	0.170031	0.121212	0.174852	0.139506	0.150407	0.0901965	0.0832294	0.0805225	0.353293	0.410522	0.153414
psm3NN pph3D IPC	0.175037	0.163449	0.137004	0.198279	0.126661	0.152299	0.084289	0.0973604	0.0774887	0.431079	0.495914	0.159028
psm3NN pph3D IPD	0.172134	0.146982	0.120147	0.190133	0.118395	0.142995	0.0703518	0.0767978	0.0697411	0.326866	0.42107	0.109489
psm3NN pph3D pef1D IPA	0.413585	0.753683	0.758311	0.513837	0.928485	0.442337	0.51544	0.553843	0.347362	1.44724	1.98739	0.741294
psm3NN pph3D pef1D IPB	0.434101	0.695542	0.575758	0.489304	0.822222	0.378703	0.57882	0.498519	0.38422	1.69987	1.90348	0.76333
psm3NN pph3D pef1D IPC	0.452374	0.762082	0.627401	0.562151	0.930027	0.5757	0.620518	0.728454	0.410252	1.93535	1.78403	0.790972
psm3NN pph3D pef1D IPD	0.459978	0.775076	0.715018	0.650568	0.899217	0.532902	0.606225	0.628292	0.391932	1.69878	1.96846	0.725547
psm3NN pph3D rad21-T262A	0.286793	0.257916	0.305481	0.238161	0.330909	0.22915	0.198056	0.205137	0.209137	0.652422	0.802892	0.281924
psm3NN pph3D rad21-T262A	0.334594	0.266402	0.255411	0.244731	0.298765	0.239045	0.262475	0.212951	0.226535	0.728051	0.791407	0.282507
psm3NN pph3D rad21-T262A	0.287418	0.319457	0.306018	0.25974	0.333038	0.329686	0.235733	0.24837	0.217084	0.888038	0.839632	0.335417
psm3NN pph3D rad21-T262A	0.264063	0.269684	0.301832	0.284071	0.294521	0.270772	0.198287	0.220864	0.221073	0.711762	0.763921	0.353285
psm3NN pph3D vs psm3NN pph3D pef1D
Unpaired t test	< 0.0001	< 0.0001	< 0.0001	< 0.0001	< 0.0001	0.0003	< 0.0001	< 0.0001	< 0.0001	< 0.0001	< 0.0001	< 0.0001
P value	***	***	***	***	***	***	***	***	***	***	***	***
P value summary	Yes	Yes	Yes	Yes	Yes	Yes	Yes	Yes	Yes	Yes	Yes	Yes
Are means signif. different? (P < 0.05)	Two-tailed	Two-tailed	Two-tailed	Two-tailed	Two-tailed	Two-tailed	Two-tailed	Two-tailed	Two-tailed	Two-tailed	Two-tailed	Two-tailed
One- or two-tailed P value?
psm3NN pph3D vs psm3NN pph3D rad21-T262A
Unpaired t test	0.0007	0.0002	< 0.0001	0.001	< 0.0001	0.0016	0.0001	< 0.0001	< 0.0001	0.0005	< 0.0001	0.0002
P value	***	***	***	***	***	**	***	***	***	***	***	***
P value summary	Yes	Yes	Yes	Yes	Yes	Yes	Yes	Yes	Yes	Yes	Yes	Yes
Are means signif. different? (P < 0.05)	Two-tailed	Two-tailed	Two-tailed	Two-tailed	Two-tailed	Two-tailed	Two-tailed	Two-tailed	Two-tailed	Two-tailed	Two-tailed	Two-tailed
One- or two-tailed P value?

## Sheet: Fig.7E_Rad21-PK ChIP
Rad21-PK ChIP cdc10 arrest	438	tRNA-L	Imr2-L	cc2	dg2-R	tRNA-R	1806	2898	3323	28S	NTS	Tel1-R
wild type	0.00995957	0.0133309	0.0600481	0.0284677	0.0648242	0.0209174	0.0107929	0.0185585	0.0146725	0.0114566	0.031115	0.0765812
wild type	0.0105483	0.0145235	0.0609532	0.0241897	0.0543516	0.0180387	0.0115915	0.0171147	0.0138258	0.0102217	0.0286765	0.0828635
wild type	0.0128462	0.0189496	0.0653679	0.0257474	0.0567906	0.0193483	0.0165839	0.0189859	0.0163331	0.0108296	0.0252801	0.0992909
wild type	0.0125144	0.0166777	0.0610552	0.0246268	0.0581029	0.0200487	0.0154673	0.0186556	0.0156407	0.0101077	0.0247683	0.0933378
pef1D	0.0150277	0.019452	0.119249	0.0695238	0.0815023	0.0159602	0.0165708	0.0202316	0.0224629	0.0135389	0.0450711	0.137448
pef1D	0.0160435	0.0193835	0.115329	0.0560797	0.084981	0.0169029	0.0178916	0.023421	0.021731	0.0131357	0.0470415	0.133851
pef1D	0.0123847	0.0186158	0.0992289	0.0460926	0.0783527	0.0167627	0.0168727	0.0168552	0.0188797	0.0106145	0.0385526	0.102102
pef1D	0.0106538	0.0187124	0.0978365	0.0465626	0.071417	0.018464	0.0161755	0.0148974	0.0159583	0.0101148	0.0367152	0.103329
pph3D	0.00609605	0.0101579	0.0413142	0.0140643	0.0428436	0.0108286	0.00810168	0.0128882	0.0105632	0.00893774	0.0242227	0.0560962
pph3D	0.0059969	0.00997201	0.042314	0.015516	0.0427834	0.0110224	0.00771671	0.0124203	0.00921474	0.00978139	0.029292	0.0614251
pph3D	0.00489277	0.0084606	0.031202	0.0140051	0.0326477	0.00927217	0.00588649	0.00937877	0.00753853	0.00536601	0.0174972	0.0441753
pph3D	0.00466239	0.008423	0.0339416	0.0134098	0.0318487	0.00960784	0.00559511	0.00828845	0.00730007	0.00513214	0.0165319	0.0421601
pef1D pph3D	0.00958772	0.0156208	0.0952948	0.0431728	0.0932748	0.0148232	0.0153585	0.0177011	0.0153149	0.00972543	0.0484359	0.10595
pef1D pph3D	0.00743281	0.0109912	0.0679608	0.0301593	0.0646924	0.0121478	0.0113763	0.0149695	0.0117824	0.00770903	0.035563	0.0691757
pef1D pph3D	0.0104998	0.0164763	0.102874	0.0438096	0.0879952	0.0165181	0.0155935	0.0177674	0.0156762	0.0109109	0.0479358	0.100499
pef1D pph3D	0.0098703	0.0162372	0.112234	0.0444827	0.0873941	0.0150511	0.0162989	0.0193367	0.0160982	0.0112887	0.0483808	0.108413
Enrichment relative to wt
pef1D	1.50887	1.45917	1.98589	2.4422	1.25728	0.763013	1.53535	1.09015	1.53095	1.18176	1.44853	1.7948
pef1D	1.52096	1.33463	1.89209	2.31833	1.56354	0.937032	1.54351	1.36847	1.57177	1.28508	1.64042	1.61532
pef1D	0.964074	0.982386	1.51801	1.79018	1.37968	0.866367	1.01742	0.887773	1.15591	0.980136	1.52502	1.02831
pef1D	0.851324	1.122	1.60243	1.89073	1.22915	0.920954	1.04579	0.798552	1.02031	1.00071	1.48235	1.10704
pph3D	0.61208	0.761977	0.688019	0.494044	0.66092	0.517682	0.750652	0.694465	0.719929	0.78014	0.778488	0.732506
pph3D	0.568519	0.686613	0.694204	0.64143	0.78716	0.61104	0.665721	0.725708	0.666488	0.956922	1.02146	0.741281
pph3D	0.380873	0.44648	0.47733	0.543941	0.574878	0.479224	0.354953	0.493985	0.461548	0.495492	0.692135	0.444908
pph3D	0.372563	0.505047	0.555916	0.544523	0.548143	0.479224	0.361738	0.444288	0.466735	0.507748	0.667462	0.451694
pef1D pph3D	0.962663	1.17177	1.58697	1.51655	1.43889	0.708654	1.42302	0.953799	1.04378	0.848894	1.55667	1.3835
pef1D pph3D	0.704646	0.756785	1.11497	1.24678	1.19026	0.673429	0.981433	0.874658	0.852205	0.754181	1.24014	0.834816
pef1D pph3D	0.817351	0.869483	1.57376	1.70151	1.54947	0.853725	0.940278	0.935819	0.95978	1.0075	1.89619	1.01216
pef1D pph3D	0.788717	0.973591	1.83824	1.80627	1.50412	0.750726	1.05377	1.03651	1.02925	1.11685	1.95333	1.16151
mean enrichment relative to wt
pef1D	1.21131	1.22455	1.7496	2.11036	1.35741	0.871841	1.28552	1.03624	1.31973	1.11192	1.52408	1.38637
pph3D	0.483509	0.600029	0.603867	0.555984	0.642775	0.521793	0.533266	0.589612	0.578675	0.685075	0.789887	0.592597
pef1D pph3D	0.818344	0.942907	1.52848	1.56778	1.42068	0.746633	1.09963	0.950196	0.971255	0.931856	1.66159	1.098
SD
pef1D	0.353618	0.213168	0.224672	0.31839	0.152166	0.0786033	0.293441	0.252865	0.273636	0.146738	0.0836357	0.376591
pph3D	0.124633	0.148686	0.105756	0.0616819	0.107613	0.0621992	0.204954	0.141162	0.134056	0.223848	0.161556	0.166681
pef1D pph3D	0.107446	0.176401	0.301339	0.24524	0.160183	0.0780739	0.220642	0.0667725	0.087423	0.161653	0.331047	0.232506

## Sheet: Fig7E_Rad21-PK_t-tests
Rad21-PK ChIP cdc10 arrest	438	tRNA-L	Imr2-L	cc2	dg2-R	tRNA-R	1806	2898	3323	28S	NTS	Tel1-R
wild type	0.00995957	0.0133309	0.0600481	0.0284677	0.0648242	0.0209174	0.0107929	0.0185585	0.0146725	0.0114566	0.031115	0.0765812
wild type	0.0105483	0.0145235	0.0609532	0.0241897	0.0543516	0.0180387	0.0115915	0.0171147	0.0138258	0.0102217	0.0286765	0.0828635
wild type	0.0128462	0.0189496	0.0653679	0.0257474	0.0567906	0.0193483	0.0165839	0.0189859	0.0163331	0.0108296	0.0252801	0.0992909
wild type	0.0125144	0.0166777	0.0610552	0.0246268	0.0581029	0.0200487	0.0154673	0.0186556	0.0156407	0.0101077	0.0247683	0.0933378
pef1D	0.0150277	0.019452	0.119249	0.0695238	0.0815023	0.0159602	0.0165708	0.0202316	0.0224629	0.0135389	0.0450711	0.137448
pef1D	0.0160435	0.0193835	0.115329	0.0560797	0.084981	0.0169029	0.0178916	0.023421	0.021731	0.0131357	0.0470415	0.133851
pef1D	0.0123847	0.0186158	0.0992289	0.0460926	0.0783527	0.0167627	0.0168727	0.0168552	0.0188797	0.0106145	0.0385526	0.102102
pef1D	0.0106538	0.0187124	0.0978365	0.0465626	0.071417	0.018464	0.0161755	0.0148974	0.0159583	0.0101148	0.0367152	0.103329
pph3D	0.00609605	0.0101579	0.0413142	0.0140643	0.0428436	0.0108286	0.00810168	0.0128882	0.0105632	0.00893774	0.0242227	0.0560962
pph3D	0.0059969	0.00997201	0.042314	0.015516	0.0427834	0.0110224	0.00771671	0.0124203	0.00921474	0.00978139	0.029292	0.0614251
pph3D	0.00489277	0.0084606	0.031202	0.0140051	0.0326477	0.00927217	0.00588649	0.00937877	0.00753853	0.00536601	0.0174972	0.0441753
pph3D	0.00466239	0.008423	0.0339416	0.0134098	0.0318487	0.00960784	0.00559511	0.00828845	0.00730007	0.00513214	0.0165319	0.0421601
t-test Rad21-PK pef1D vs wt
Unpaired t test
P value	0.1885	0.0439	0.0002	0.0021	0.0013	0.021	0.0678	0.803	0.0249	0.2488	0.0025	0.0279
P value summary	ns	*	***	**	**	*	ns	ns	*	ns	**	*
Are means signif. different? (P < 0.05)	No	Yes	Yes	Yes	Yes	Yes	No	No	Yes	No	Yes	Yes
One- or two-tailed P value?	Two-tailed	Two-tailed	Two-tailed	Two-tailed	Two-tailed	Two-tailed	Two-tailed	Two-tailed	Two-tailed	Two-tailed	Two-tailed	Two-tailed
t-test Rad21-PK pph3D vs wt
Unpaired t test
P value	0.0003	0.0026	0.0002	< 0.0001	0.0014	< 0.0001	0.0048	0.0007	0.0005	0.0357	0.1462	0.0015
P value summary	***	**	***	***	**	***	**	***	***	*	ns	**
Are means signif. different? (P < 0.05)	Yes	Yes	Yes	Yes	Yes	Yes	Yes	Yes	Yes	Yes	No	Yes
One- or two-tailed P value?	Two-tailed	Two-tailed	Two-tailed	Two-tailed	Two-tailed	Two-tailed	Two-tailed	Two-tailed	Two-tailed	Two-tailed	Two-tailed	Two-tailed

## Sheet: Fig.7E_Mis4-GFP ChIP
Mis4-GFP ChIP cdc10 arrest	438	tRNA-L	Imr2-L	cc2	dg2-R	tRNA-R	1806	2898	3323	28S	NTS	Tel1-R
wild type	0.00512856	0.00698497	0.0132518	0.0186288	0.0170233	0.00830132	0.00339254	0.00472391	0.00522543	0.0108067	0.0194184	0.0180297
wild type	0.00559945	0.00665498	0.01414	0.0156494	0.014486	0.00812074	0.00336686	0.00495327	0.00468119	0.0104836	0.0188271	0.018381
wild type	0.00853742	0.0110109	0.020794	0.0225815	0.0233551	0.0112876	0.00509447	0.00850606	0.0083127	0.0113986	0.0218952	0.0254885
wild type	0.0070191	0.00958506	0.0185937	0.020783	0.0203743	0.00944859	0.00451235	0.00658015	0.00605466	0.0094306	0.020181	0.0226835
pef1D	0.00908113	0.0133266	0.0368128	0.0339335	0.0360071	0.0138231	0.0071822	0.0124207	0.0106649	0.015583	0.0660943	0.0369984
pef1D	0.00746166	0.0120588	0.0335082	0.0299217	0.0355362	0.0115029	0.00588583	0.010222	0.00925571	0.0122942	0.0582562	0.033629
pef1D	0.00796413	0.0123644	0.0331576	0.0330528	0.0327977	0.0122206	0.00508171	0.0117923	0.00929914	0.0144989	0.0563994	0.0377067
pef1D	0.00656879	0.0110266	0.0328727	0.0278579	0.0305819	0.0107814	0.00519939	0.0101569	0.00760704	0.0126991	0.0428397	0.0339289
pph3D	0.00611572	0.00693995	0.00989762	0.0176767	0.0111036	0.00711793	0.00443106	0.0057916	0.00584686	0.0143379	0.0217733	0.0133252
pph3D	0.0050353	0.00517874	0.00772268	0.0150571	0.00943087	0.00578692	0.00339703	0.00349607	0.00419804	0.011911	0.0176295	0.0104478
pph3D	0.00632913	0.00646924	0.0106811	0.0126909	0.0106353	0.00686065	0.0045035	0.00594835	0.005396	0.00636238	0.013933	0.0117774
pph3D	0.00510164	0.00642105	0.00888487	0.00970235	0.00932664	0.00635897	0.00340776	0.00441212	0.00399955	0.00604975	0.0130422	0.00968177
pef1D pph3D	0.00787216	0.0102447	0.0297143	0.0287706	0.0275998	0.0091247	0.00534635	0.0109036	0.00784948	0.0215546	0.0572559	0.0322881
pef1D pph3D	0.00708844	0.0102003	0.0238465	0.0299923	0.0272127	0.00942793	0.0059874	0.0090886	0.00774734	0.0224952	0.0617613	0.0304988
pef1D pph3D	0.00574265	0.0074257	0.0231358	0.0296512	0.0232039	0.00779043	0.00397969	0.00701499	0.0055395	0.0148556	0.0505156	0.0275186
pef1D pph3D	0.00499904	0.00634607	0.0203096	0.0216182	0.018805	0.00640964	0.00375967	0.005066	0.00473164	0.0131717	0.0429167	0.0242447
Enrichment relative to wt
pef1D	1.7707	1.9079	2.77794	1.82156	2.11517	1.66517	2.11706	2.62933	2.04096	1.44198	3.40369	2.05208
pef1D	1.33257	1.812	2.36975	1.912	2.45314	1.41649	1.74816	2.06368	1.97721	1.17271	3.09427	1.82956
pef1D	0.93285	1.12292	1.59458	1.46371	1.40431	1.08266	0.997495	1.38634	1.11867	1.27199	2.57588	1.47937
pef1D	0.935844	1.15039	1.76795	1.34042	1.501	1.14106	1.15226	1.54356	1.25639	1.34659	2.12277	1.49575
pph3D	1.19248	0.993555	0.746886	0.948892	0.652262	0.857446	1.30612	1.22602	1.11892	1.32675	1.12127	0.739072
pph3D	0.89925	0.778175	0.546159	0.962151	0.651033	0.71261	1.00896	0.705811	0.896789	1.13615	0.936389	0.568403
pph3D	0.741341	0.587529	0.513663	0.562003	0.455374	0.607806	0.883998	0.699307	0.649127	0.558174	0.636348	0.462069
pph3D	0.726823	0.669902	0.477843	0.466842	0.457764	0.673008	0.755208	0.670519	0.660575	0.641502	0.646263	0.426819
pef1D pph3D	1.53496	1.46668	2.24228	1.54442	1.6213	1.09919	1.57591	2.30817	1.50217	1.99455	2.94854	1.79083
pef1D pph3D	1.26592	1.53272	1.68646	1.91651	1.87855	1.16097	1.77833	1.83487	1.65499	2.14574	3.28045	1.65926
pef1D pph3D	0.672645	0.674393	1.11262	1.31307	0.993526	0.690178	0.781178	0.824704	0.66639	1.30329	2.30715	1.07965
pef1D pph3D	0.712205	0.662079	1.09228	1.04019	0.922977	0.67837	0.833196	0.769892	0.781487	1.3967	2.12659	1.06882
mean enrichment relative to wt
pef1D	1.24299	1.4983	2.12755	1.63442	1.8684	1.32635	1.50374	1.90573	1.59831	1.30832	2.79915	1.71419
pph3D	0.889974	0.75729	0.571138	0.734972	0.554109	0.712717	0.988572	0.825414	0.831354	0.915646	0.835067	0.549091
pef1D pph3D	1.04643	1.08397	1.53341	1.45355	1.35409	0.907176	1.24216	1.43441	1.15126	1.71007	2.66568	1.39964
SD
pef1D	0.398759	0.419576	0.546212	0.27547	0.50106	0.268726	0.521449	0.562578	0.478356	0.114074	0.565658	0.277093
pph3D	0.216262	0.175796	0.120442	0.257672	0.112634	0.105719	0.235688	0.26751	0.223122	0.374422	0.23616	0.140225
pef1D pph3D	0.423581	0.48083	0.546984	0.371121	0.469866	0.258663	0.509453	0.760953	0.499571	0.422065	0.540714	0.379591

## Sheet: Fig.7E_Mis4-GFP_t-tests
Mis4-GFP ChIP cdc10 arrest	438	tRNA-L	Imr2-L	cc2	dg2-R	tRNA-R	1806	2898	3323	28S	NTS	Tel1-R
wild type	0.00512856	0.00698497	0.0132518	0.0186288	0.0170233	0.00830132	0.00339254	0.00472391	0.00522543	0.0108067	0.0194184	0.0180297
wild type	0.00559945	0.00665498	0.01414	0.0156494	0.014486	0.00812074	0.00336686	0.00495327	0.00468119	0.0104836	0.0188271	0.018381
wild type	0.00853742	0.0110109	0.020794	0.0225815	0.0233551	0.0112876	0.00509447	0.00850606	0.0083127	0.0113986	0.0218952	0.0254885
wild type	0.0070191	0.00958506	0.0185937	0.020783	0.0203743	0.00944859	0.00451235	0.00658015	0.00605466	0.0094306	0.020181	0.0226835
pef1D	0.00908113	0.0133266	0.0368128	0.0339335	0.0360071	0.0138231	0.0071822	0.0124207	0.0106649	0.015583	0.0660943	0.0369984
pef1D	0.00746166	0.0120588	0.0335082	0.0299217	0.0355362	0.0115029	0.00588583	0.010222	0.00925571	0.0122942	0.0582562	0.033629
pef1D	0.00796413	0.0123644	0.0331576	0.0330528	0.0327977	0.0122206	0.00508171	0.0117923	0.00929914	0.0144989	0.0563994	0.0377067
pef1D	0.00656879	0.0110266	0.0328727	0.0278579	0.0305819	0.0107814	0.00519939	0.0101569	0.00760704	0.0126991	0.0428397	0.0339289
pph3D	0.00611572	0.00693995	0.00989762	0.0176767	0.0111036	0.00711793	0.00443106	0.0057916	0.00584686	0.0143379	0.0217733	0.0133252
pph3D	0.0050353	0.00517874	0.00772268	0.0150571	0.00943087	0.00578692	0.00339703	0.00349607	0.00419804	0.011911	0.0176295	0.0104478
pph3D	0.00632913	0.00646924	0.0106811	0.0126909	0.0106353	0.00686065	0.0045035	0.00594835	0.005396	0.00636238	0.013933	0.0117774
pph3D	0.00510164	0.00642105	0.00888487	0.00970235	0.00932664	0.00635897	0.00340776	0.00441212	0.00399955	0.00604975	0.0130422	0.00968177
t-test Mis4-GFP pef1D vs wt
Unpaired t test
P value	0.2254	0.0192	0.0001	0.0012	0.0007	0.0283	0.0344	0.0031	0.0213	0.0102	0.0003	0.0005
P value summary	ns	*	***	**	***	*	*	**	*	*	***	***
Are means signif. different? (P < 0.05)	No	Yes	Yes	Yes	Yes	Yes	Yes	Yes	Yes	Yes	Yes	Yes
One- or two-tailed P value?	Two-tailed	Two-tailed	Two-tailed	Two-tailed	Two-tailed	Two-tailed	Two-tailed	Two-tailed	Two-tailed	Two-tailed	Two-tailed	Two-tailed
t-test Mis4-GFP pph3D vs wt
Unpaired t test
P value	0.3101	0.0791	0.0082	0.0491	0.0047	0.0135	0.748	0.2608	0.2273	0.6908	0.1492	0.0024
P value summary	ns	ns	**	*	**	*	ns	ns	ns	ns	ns	**
Are means signif. different? (P < 0.05)	No	No	Yes	Yes	Yes	Yes	No	No	No	No	No	Yes
One- or two-tailed P value?	Two-tailed	Two-tailed	Two-tailed	Two-tailed	Two-tailed	Two-tailed	Two-tailed	Two-tailed	Two-tailed	Two-tailed	Two-tailed	Two-tailed
