# Supplementary material for: The CDK Pef1 and protein phosphatase 4 oppose each other for regulating cohesin binding to fission yeast chromosomes
Source: eLife. 2020 Jan 2;9:e50556. doi: 10.7554/eLife.50556 (PMC6954021; doi:10.7554/eLife.50556)
Supplement: Supplementary file 1. [file elife-50556-supp1.docx]

| Key Resources Table | | | | |
| --- | --- | --- | --- | --- |
| Reagent type (species) or resource | Designation | Source or reference | Identifiers | Additional information |
| Strain, strain background (*S. pombe*) | *h-* | This study | 2 | J.P.J. Lab. Strain collection |
| Strain, strain background (*S. pombe*) | *h+*/*h-* *leu1/leu1 ura4-D18/ura4-D18 ade6-210/ade6-216 ssl3*::*ura4*+*/ssl3*+ | This study | 962 | J.P.J. Lab. Strain collection |
| Strain, strain background (*S. pombe*) | *h-* *rad21-9PK-kan*R *psm3*K105NK106N | This study | 1004 | J.P.J. Lab. Strain collection |
| Strain, strain background (*S. pombe*) | *h-* *mis4-367* | This study | 2729 | J.P.J. Lab. Strain collection |
| Strain, strain background (*S. pombe*) | *h+* *mis4-367* | This study | 2730 | J.P.J. Lab. Strain collection |
| Strain, strain background (*S. pombe*) | *h-* *leu1* *mis4-3HA-LEU2* | This study | 2804 | J.P.J. Lab. Strain collection |
| Strain, strain background (*S. pombe*) | *h-* *wpl1*::*kan*R | This study | 3060 | J.P.J. Lab. Strain collection |
| Strain, strain background (*S. pombe*) | *h-* *mis4-367* *wpl1*::*kan*R | This study | 3474 | J.P.J. Lab. Strain collection |
| Strain, strain background (*S. pombe*) | *h-* *ura4-D18* *pas1*::*ura4*+ | PMID: 10982385 | 3637 | J.P.J. Lab. Strain collection |
| Strain, strain background (*S. pombe*) | *h-* *ura4-18* *mis4-367* *pef1*::*ura4*+ | This study | 3651 | J.P.J. Lab. Strain collection |
| Strain, strain background (*S. pombe*) | *h+* *ura4-D18* *mis4-367* *pef1*::*ura4*+ | This study | 3652 | J.P.J. Lab. Strain collection |
| Strain, strain background (*S. pombe*) | *h-* *rad21-9PK-kan*R | This study | 3789 | J.P.J. Lab. Strain collection |
| Strain, strain background (*S. pombe*) | *h-* *mis4-367 rad21-9PK-kan*R | This study | 3791 | J.P.J. Lab. Strain collection |
| Strain, strain background (*S. pombe*) | *h+* | This study | 3820 | J.P.J. Lab. Strain collection |
| Strain, strain background (*S. pombe*) | *h+*/*h-* *leu1/leu1*+ *ura4-D18/ura4-D18 ade6-210/ade6-216* *mis4*+/*mis4*::*kan*R *pef1*::*ura4*+/ *pef1*::*ura4*+ | This study | 3982 | J.P.J. Lab. Strain collection |
| Strain, strain background (*S. pombe*) | *h-* *cdc10-129 rad21-9PK-kan*R | This study | 3984 | J.P.J. Lab. Strain collection |
| Strain, strain background (*S. pombe*) | *h-* *cdc10-129* | This study | 3985 | J.P.J. Lab. Strain collection |
| Strain, strain background (*S. pombe*) | *h- cdc25-22 pef1-as rad21-9PK-kanR* | This study | 4822 | J.P.J. Lab. Strain collection |
| Strain, strain background (*S. pombe*) | *h- ura4-D18 mis4-367 swi6::ura4+* | This study | 5124 | J.P.J. Lab. Strain collection |
| Strain, strain background (*S. pombe*) | *h- his1-102 swi6::his1+* | This study | 5584 | J.P.J. Lab. Strain collection |
| Strain, strain background (*S. pombe*) | *h+* *eso1-H17* | This study | 5912 | J.P.J. Lab. Strain collection |
| Strain, strain background (*S. pombe*) | *h-* *eso1-H17* | This study | 5913 | J.P.J. Lab. Strain collection |
| Strain, strain background (*S. pombe*) | *h+* *pph3*::*hyg*R | This study | 6095 | J.P.J. Lab. Strain collection |
| Strain, strain background (*S. pombe*) | *h-* *mis4-367 pph3*::*hyg*R | This study | 6209 | J.P.J. Lab. Strain collection |
| Strain, strain background (*S. pombe*) | *h-* *mis4-367 pef1*::*ura4*+ *pph3*::*hyg*R *ura4-D18* | This study | 6212 | J.P.J. Lab. Strain collection |
| Strain, strain background (*S. pombe*) | *h-* *cdc10-129 rad21-9PK-kan*R *pef1*::*ura4*+ *ura4-D18* | This study | 6228 | J.P.J. Lab. Strain collection |
| Strain, strain background (*S. pombe*) | *h+* *ura4-D18* *pef1*::*ura4*+ | This study | 6246 | J.P.J. Lab. Strain collection |
| Strain, strain background (*S. pombe*) | *h-* *cdc10-129* *ura4-D18* *pef1*::*ura4*+ *rad21FLAG3-kan*R | This study | 6360 | J.P.J. Lab. Strain collection |
| Strain, strain background (*S. pombe*) | *h-* *cdc10-129* *rad21FLAG3-kan*R | This study | 6393 | J.P.J. Lab. Strain collection |
| Strain, strain background (*S. pombe*) | *h-* *pef1-GFP-nat*R | This study | 6400 | J.P.J. Lab. Strain collection |
| Strain, strain background (*S. pombe*) | *h-* *pef1*::*nat*R | This study | 6638 | J.P.J. Lab. Strain collection |
| Strain, strain background (*S. pombe*) | *h+* *pef1*::*hyg*R | This study | 6645 | J.P.J. Lab. Strain collection |
| Strain, strain background (*S. pombe*) | *h-* *pef1*::*hyg*R | This study | 6646 | J.P.J. Lab. Strain collection |
| Strain, strain background (*S. pombe*) | *h-* *pef1-F78A* | This study | 6699 | J.P.J. Lab. Strain collection |
| Strain, strain background (*S. pombe*) | *h-rad21-9PK-kan*R *pef1-F78A* | This study | 6701 | J.P.J. Lab. Strain collection |
| Strain, strain background (*S. pombe*) | *h-* *eso1-H17* *pef1*::*hyg*R | This study | 6724 | J.P.J. Lab. Strain collection |
| Strain, strain background (*S. pombe*) | *h+* *eso1-H17* *pef1*::*hyg*R | This study | 6725 | J.P.J. Lab. Strain collection |
| Strain, strain background (*S. pombe*) | *h-* *mis4-367* *pef1-F78A* | This study | 6747 | J.P.J. Lab. Strain collection |
| Strain, strain background (*S. pombe*) | *h-* *mis4-367* *pef1*::*hyg*R | This study | 6753 | J.P.J. Lab. Strain collection |
| Strain, strain background (*S. pombe*) | *h-* *ura4*+-*tet*ON | This study | 6777 | J.P.J. Lab. Strain collection |
| Strain, strain background (*S. pombe*) | *h-* *mis4-367 pef1*::*nat*R | This study | 6849 | J.P.J. Lab. Strain collection |
| Strain, strain background (*S. pombe*) | *h-* *mis4-367 rad21-9PK-kan*R *pef1-F78A* | This study | 6923 | J.P.J. Lab. Strain collection |
| Strain, strain background (*S. pombe*) | *psm3-gly11-TEV3-rad21-kanR* *pef1*::*nat*R | This study | 6926 | J.P.J. Lab. Strain collection |
| Strain, strain background (*S. pombe*) | *psm3-gly11-TEV3-rad21-kanR* | This study | 6928 | J.P.J. Lab. Strain collection |
| Strain, strain background (*S. pombe*) | *h-* *mis4-367 psm3-gly11-TEV3-rad21-kanR* *pef1*::*nat*R | This study | 6929 | J.P.J. Lab. Strain collection |
| Strain, strain background (*S. pombe*) | *h-* *leu1* *pef1-GFP-nat*R *mis4-3HA-LEU2* | This study | 6940 | J.P.J. Lab. Strain collection |
| Strain, strain background (*S. pombe*) | *h-* *mis4-367 psm3-gly11-TEV3-rad21-kanR* | This study | 6943 | J.P.J. Lab. Strain collection |
| Strain, strain background (*S. pombe*) | *h- ura4-D18 eso1*::*ura4*+ *rad21*::*nat*R *psm3-gly11-TEV3-rad21-kanR* | This study | 6959 | J.P.J. Lab. Strain collection |
| Strain, strain background (*S. pombe*) | *h- ura4-D18 eso1*::*ura4*+ *wpl1*::*hyg*R *rad21*::*nat*R *psm3-gly11-TEV3-rad21-kanR* | This study | 6961 | J.P.J. Lab. Strain collection |
| Strain, strain background (*S. pombe*) | *h- ura4-18 eso1*::*ura4*+ *wpl1*::*hyg*R | This study | 6979 | J.P.J. Lab. Strain collection |
| Strain, strain background (*S. pombe*) | *h-* *rad21-9PK-kanR* *pef1*::*nat*R | This study | 7411 | J.P.J. Lab. Strain collection |
| Strain, strain background (*S. pombe*) | *h-rad21-9PK-kan*R *ura4-D18 eso1*::*ura4*+ *wpl1*::*hyg*R | This study | 7512 | J.P.J. Lab. Strain collection |
| Strain, strain background (*S. pombe*) | *h-* *ura4*+-*tet*ON *SPNCRNA.458*::*hyg*R-*tet07*-*rad21FLAG3-kanR* | This study | 7548 | J.P.J. Lab. Strain collection |
| Strain, strain background (*S. pombe*) | *h-* *ura4*+-*tet*ON *SPNCRNA.458*::*hyg*R-*tet07*-*rad21FLAG3-kanR rad21*::*ura4*+ | This study | 7567 | J.P.J. Lab. Strain collection |
| Strain, strain background (*S. pombe*) | *h-* *ura4*+-*tet*ON *SPNCRNA.458*::*hyg*R-*tet07*-*rad21FLAG3-kanR rad21*::*ura4*+ *mis4-367* | This study | 7580 | J.P.J. Lab. Strain collection |
| Strain, strain background (*S. pombe*) | *h-* *ura4*+-*tet*ON *SPNCRNA.458*::*hyg*R-*tet07*-*rad21FLAG3-kanR rad21*::*ura4*+ *mis4-367 pef1*::*nat*R | This study | 7598 | J.P.J. Lab. Strain collection |
| Strain, strain background (*S. pombe*) | *h+* *mis4-242* *pef1*::*nat*R | This study | 7638 | J.P.J. Lab. Strain collection |
| Strain, strain background (*S. pombe*) | *h+* *mis4-242* | This study | 7639 | J.P.J. Lab. Strain collection |
| Strain, strain background (*S. pombe*) | *h-* *cdc10-129* *pef1-GFP-nat*R *ura4-D18* | This study | 7753 | J.P.J. Lab. Strain collection |
| Strain, strain background (*S. pombe*) | *h-* *mis4-367 pef1-F78A cdc10-129 NCRNA458::hygR-tet07-rad21-FLAG3-kanR ura4+-TetON* | This study | 7835 | J.P.J. Lab. Strain collection |
| Strain, strain background (*S. pombe*) | *h- pef1-as cdc10-129 rad21-9PK-kanR* | This study | 7964 | J.P.J. Lab. Strain collection |
| Strain, strain background (*S. pombe*) | *h+* *leu1-32* *ssl3*::*ura4*+ *ars1-ssl3-29*ts-*LEU2* | This study | 8112 | J.P.J. Lab. Strain collection |
| Strain, strain background (*S. pombe*) | *h+* *leu1-32* *ssl3*::*ura4*+ *ars1-ssl3-29*ts-*LEU2* *pef1*::*hyg*R | This study | 8114 | J.P.J. Lab. Strain collection |
| Strain, strain background (*S. pombe*) | *h+* *pph3*::*hyg*R *pef1*::*kan*R | This study | 9453 | J.P.J. Lab. Strain collection |
| Strain, strain background (*S. pombe*) | *h- pph3*::*hyg*R *psm3K105NK106N* | This study | 9520 | J.P.J. Lab. Strain collection |
| Strain, strain background (*S. pombe*) | h- *pph3*::*hyg*R *psm3K105NK106N* *mis4I803M* | This study | 9590 | J.P.J. Lab. Strain collection |
| Strain, strain background (*S. pombe*) | *h+* *pph3*::*hyg*R *psm3K105NK106N mis4I803M* | This study | 9591 | J.P.J. Lab. Strain collection |
| Strain, strain background (*S. pombe*) | *h+* *pph3*::*hyg*R *psm3K105NK106N* | This study | 9664 | J.P.J. Lab. Strain collection |
| Strain, strain background (*S. pombe*) | *h-* *cdc10-129* *leu1-32 mis4-GFP-LEU2* | This study | 9748 | J.P.J. Lab. Strain collection |
| Strain, strain background (*S. pombe*) | *h-* *psm3*K105NK106N *pph3*::*hyg*R *pas1*::*nat*R | This study | 9806 | J.P.J. Lab. Strain collection |
| Strain, strain background (*S. pombe*) | *h-* *psm3*K105NK106N *pph3*::*hyg*R *pef1*::*nat*R | This study | 9849 | J.P.J. Lab. Strain collection |
| Strain, strain background (*S. pombe*) | *h- ura4-D18 mis4-367 pef1::natR swi6::ura4* | This study | 9853 | J.P.J. Lab. Strain collection |
| Strain, strain background (*S. pombe*) | *h- ura4-D18 pef1::natR swi6::ura4+* | This study | 9855 | J.P.J. Lab. Strain collection |
| Strain, strain background (*S. pombe*) | *h+*/*h-* *leu1/leu1 ura4-D18/ura4-D18 ade6-210/ade6-216 ssl3*::*ura4*+*/ssl3*+ *pef1*::*nat*R/*pef1*+ | This study | 9922 | J.P.J. Lab. Strain collection |
| Strain, strain background (*S. pombe*) | *h+*/*h-* *leu1/leu1 ura4-D18/ura4-D18 ade6-210/ade6-216 ssl3*::*ura4*+*/ssl3*+ *wpl1*::*kan*R/*wpl1*+ | This study | 9923 | J.P.J. Lab. Strain collection |
| Strain, strain background (*S. pombe*) | *h-* *clg1*::*kan*R | This study | 9959 | J.P.J. Lab. Strain collection |
| Strain, strain background (*S. pombe*) | *h-* *psl1*::*kan*R | This study | 9967 | J.P.J. Lab. Strain collection |
| Strain, strain background (*S. pombe*) | *h-* *mis4-367* *clg1*::*kan*R | This study | 9993 | J.P.J. Lab. Strain collection |
| Strain, strain background (*S. pombe*) | *h-* *mis4-367 psl1*::*kan*R | This study | 9995 | J.P.J. Lab. Strain collection |
| Strain, strain background (*S. pombe*) | *h-* *psm3*K105NK106N *pph3*::*hyg*R *clg1*::*kan*R | This study | 10030 | J.P.J. Lab. Strain collection |
| Strain, strain background (*S. pombe*) | *h-* *psm3*K105NK106N *pph3*::*hyg*R *psl1*::*kan*R | This study | 10032 | J.P.J. Lab. Strain collection |
| Strain, strain background (*S. pombe*) | *h-* *psm3*K105NK106N *pph3*::*hyg*R | This study | 10034 | J.P.J. Lab. Strain collection |
| Strain, strain background (*S. pombe*) | *h-* *rad21-9PK-kan*R *psm3*K105NK106N *pph3*::*hyg*R *pef1*::*nat*R | This study | 10035 | J.P.J. Lab. Strain collection |
| Strain, strain background (*S. pombe*) | *h-* *psl1-pef1-GFP-kan*R *pef1*::*ura4*+ *ura4-D18* | This study | 10083 | J.P.J. Lab. Strain collection |
| Strain, strain background (*S. pombe*) | *h-* *cdc10-129* *pef1-GFP-nat*R *pas1*::*kan*R | This study | 10129 | J.P.J. Lab. Strain collection |
| Strain, strain background (*S. pombe*) | h- *h-* *pef1-GFP-nat*R *ura4-D18* *pas1*::*ura4*+ | This study | 10135 | J.P.J. Lab. Strain collection |
| Strain, strain background (*S. pombe*) | *h+* *psm3*K105NK106N *pph3*::*hyg*R | This study | 10150 | J.P.J. Lab. Strain collection |
| Strain, strain background (*S. pombe*) | *h-* *psm3*K105NK106N *rad21-T262A* | This study | 10151 | J.P.J. Lab. Strain collection |
| Strain, strain background (*S. pombe*) | *h+* *psm3*K105NK106N *pph3*::*hyg*R *rad21-T262A* | This study | 10153 | J.P.J. Lab. Strain collection |
| Strain, strain background (*S. pombe*) | *h+* *psm3*K105NK106N *rad21-T262D* | This study | 10154 | J.P.J. Lab. Strain collection |
| Strain, strain background (*S. pombe*) | *h+* *psm3*K105NK106N *pph3*::*hyg*R *rad21-T262D* | This study | 10156 | J.P.J. Lab. Strain collection |
| Strain, strain background (*S. pombe*) | *h+* *psm3*K105NK106N *rad21-T262E* | This study | 10158 | J.P.J. Lab. Strain collection |
| Strain, strain background (*S. pombe*) | *h+* *psm3*K105NK106N *pph3*::*hyg*R *rad21-T262E* | This study | 10160 | J.P.J. Lab. Strain collection |
| Strain, strain background (*S. pombe*) | *h-* *cdc10-129* *pef1-GFP-nat*R *psl1*::*kan*R | This study | 10161 | J.P.J. Lab. Strain collection |
| Strain, strain background (*S. pombe*) | h- *h-* *pef1-GFP-nat*R *psl1*::*kan*R | This study | 10163 | J.P.J. Lab. Strain collection |
| Strain, strain background (*S. pombe*) | *h-* *cdc10-129* *pef1-GFP-nat*R *clg1*::*kan*R | This study | 10180 | J.P.J. Lab. Strain collection |
| Strain, strain background (*S. pombe*) | h- *h-* *pef1-GFP-nat*R *clg1*::*kan*R | This study | 10184 | J.P.J. Lab. Strain collection |
| Strain, strain background (*S. pombe*) | *h-* *mis4-367 rad21-T262D* | This study | 10191 | J.P.J. Lab. Strain collection |
| Strain, strain background (*S. pombe*) | *h-* *mis4-367 rad21-T262E* | This study | 10192 | J.P.J. Lab. Strain collection |
| Strain, strain background (*S. pombe*) | *h-* *mis4-367 rad21-T262A* | This study | 10202 | J.P.J. Lab. Strain collection |
| Strain, strain background (*S. pombe*) | *h-* *cdc10-129 leu1* *mis4-GFP-LEU2 rad21-T262A* | This study | 10258 | J.P.J. Lab. Strain collection |
| Strain, strain background (*S. pombe*) | *h-* *rad21-9PK-kan*R *psm3*K105NK106N *pef1*::*nat*R | This study | 10277 | J.P.J. Lab. Strain collection |
| Strain, strain background (*S. pombe*) | *h-* *cdc10-129* *leu1-32 mis4-GFP-LEU2* *pef1*::*hyg*R | This study | 10289 | J.P.J. Lab. Strain collection |
| Strain, strain background (*S. pombe*) | *h-* *mis4-367 rad21-T262A* *psl1*::*kan*R | This study | 10304 | J.P.J. Lab. Strain collection |
| Strain, strain background (*S. pombe*) | *h-* *mis4-367* *pas1*::*nat*R | This study | 10385 | J.P.J. Lab. Strain collection |
| Strain, strain background (*S. pombe*) | *h-* *mis4-367* *rad21-T262D* *psl1*::*kan*R | This study | 10428 | J.P.J. Lab. Strain collection |
| Strain, strain background (*S. pombe*) | *h-* *mis4-367 pph3*::*hyg*R *rad21-T262A* | This study | 10430 | J.P.J. Lab. Strain collection |
| Strain, strain background (*S. pombe*) | *h-* *mis4-367 pef1*::*nat*R *pph3*::*hyg*R *rad21-T262A* | This study | 10432 | J.P.J. Lab. Strain collection |
| Strain, strain background (*S. pombe*) | *h-* *cdc10-129 leu1* *mis4-GFP-LEU2 pef1*::*hyg*R *rad21-T262A* | This study | 10446 | J.P.J. Lab. Strain collection |
| Strain, strain background (*S. pombe*) | *h-* *mis4-367 rad21-T262E* *psl1*::*kan*R | This study | 10464 | J.P.J. Lab. Strain collection |
| Strain, strain background (*S. pombe*) | *h-* *rad21-T262A-9PK-kan*R *psm3*K105NK106N *pph3*::*hyg*R | This study | 10473 | J.P.J. Lab. Strain collection |
| Strain, strain background (*S. pombe*) | *h-* *rad21-9PK-kan*R *psm3*K105NK106N *pph3*::*hyg*R | This study | 10505 | J.P.J. Lab. Strain collection |
| Strain, strain background (*S. pombe*) | *h-* *psl1-GFP-kan*R | This study | 10513 | J.P.J. Lab. Strain collection |
| Strain, strain background (*S. pombe*) | *h-* *cdc10-129 leu1* *mis4-GFP-LEU2 pef1*::*hyg*R *rad21-T262E* | This study | 10644 | J.P.J. Lab. Strain collection |
| Strain, strain background (*S. pombe*) | *h-* *cdc10-129 leu1* *mis4-GFP-LEU2 rad21-T262E* | This study | 10645 | J.P.J. Lab. Strain collection |
| Strain, strain background (*S. pombe*) | *h-* *cdc10-129* *leu1-32 mis4-GFP-LEU2 pph3*::*kan*R | This study | 10658 | J.P.J. Lab. Strain collection |
| Strain, strain background (*S. pombe*) | *h-* *cdc10-129 rad21-9PK-kan*R *pph3*::*hyg*R | This study | 10660 | J.P.J. Lab. Strain collection |
| Strain, strain background (*S. pombe*) | *h-* *cdc10-129 rad21-9PK-kan*R *pph3*::*hyg*R *pef1*::*ura4*+ *ura4-D18* | This study | 10666 | J.P.J. Lab. Strain collection |
| Strain, strain background (*S. pombe*) | *h-* *cdc10-129* *leu1-32 mis4-GFP-LEU2 pph3*::*kan*R *pef1*::*hyg*R | This study | 10668 | J.P.J. Lab. Strain collection |
| Strain, strain background (*S. pombe*) | *h-* *rad21-T262A-9PK-kan*R *psm3*K105NK106N *pph3*::*hyg*R *pef1*::*nat*R | This study | 10670 | J.P.J. Lab. Strain collection |
| Strain, strain background (*S. pombe*) | *h+* *pph3*::*hyg*R *psm3K105NK106N mis4P810A* | This study | 10754 | J.P.J. Lab. Strain collection |
| Strain, strain background (*S. pombe*) | *h+* *pph3*::*hyg*R *psm3K105NK106N mis4T808P* | This study | 10755 | J.P.J. Lab. Strain collection |
| Strain, strain background (*S. pombe*) | *h+* *pph3*::*hyg*R *psm3K105NK106N mis4P808I* | This study | 10758 | J.P.J. Lab. Strain collection |
| Strain, strain background (*S. pombe*) | *h+* *pph3*::*hyg*R *psm3K105NK106N mis4Q822K* | This study | 10759 | J.P.J. Lab. Strain collection |
| Antibody | Mouse monoclonal anti-V5 | BioRad | Cat# MCA1360 | (1:1000) |
| Antibody | Mouse monoclonal anti-HA 16B12 | Covence | MMS-101P | (1:2000) |
| Antibody | Mouse monoclonal 6X-HIS Tag (E3D10H2/E3) | ThermoFisher Scientific | MA1-135 | (1:5000) |
| Antibody | Mouse monoclonal anti-FLAG M2 | SIGMA | F1804 | (1:3000) |
| Antibody | Rabbit monoclonal anti-thiophosphate ester antibody | Abcam | ab133473 | (1:2000) |
| Antibody | Rabbit polyclonal anti-histone H3 | Abcam | ab1791 | (1:2000) |
| Antibody | Rabbit polyclonal anti-GFP | invitrogen | A11122 | (1:1000) |
| Antibody | Mouse monoclonal anti-GFP | Roche | Cat. No.11814460001 | (1:1000) |
| Antibody | Mouse monoclonal anti-tubulin antibody TAT1 | PMID:2606940 |  | (1:10000) |
| Antibody | Rabbit polyclonal anti-S.pombe Rad21 | PMID: 21300781 |  | (1:2000) |
| Antibody | Rabbit polyclonal anti-S.pombe Psm1 | PMID:  21189291 |  | (1:5000) |
| Antibody | Rabbit polyclonal anti-S.pombe Psm3 | PMID: 21300781 |  | (1:1000) |
| Antibody | Rabbit polyclonal anti-S.pombe Psm3-Ac | PMID: 21300781 |  | (1:1000) |
| Antibody | Rabbit polyclonal anti-S.pombe Rad21-T262P | This study |  | (1:1000) |
| Sequence-based reagent | TTGAAAAACACTGAAGCCATTG | This study | 438_fw | qPCR primer |
| Sequence-based reagent | ATTCATGCAGTCACGTCCAA | This study | 438_rev | qPCR primer |
| Sequence-based reagent | CGGGAAGTTACGAGCACATT | This study | tRNA-L_fw | qPCR primer |
| Sequence-based reagent | GGTTCCGATGGTCCTGATTA | This study | tRNA-L_rev | qPCR primer |
| Sequence-based reagent | TCGGGGTTTTTCACAATCAT | This study | imr2-L_fw | qPCR primer |
| Sequence-based reagent | CAGCACATCGACCAGGATTA | This study | imr2-L_rev | qPCR primer |
| Sequence-based reagent | AGGGTACGTTTAATTCTTGGTTTT | This study | cc2_fw | qPCR primer |
| Sequence-based reagent | ACGCATCACAAAGCAGTACA | This study | cc2_rev | qPCR primer |
| Sequence-based reagent | AAGGCCCACGTTGTTTGAAA | This study | dg2-R_fw | qPCR primer |
| Sequence-based reagent | TGGCATCAAATACTGCAAGGT | This study | dg2-R_rev | qPCR primer |
| Sequence-based reagent | GAGGACAGCATTGGCTGTTT | This study | tRNA-R_fw | qPCR primer |
| Sequence-based reagent | TGTCTGAAATCTCAACCATATTCAA | This study | tRNA-R_rev | qPCR primer |
| Sequence-based reagent | AGCAAAAGCACCGACTTCAT | This study | 1806_fw | qPCR primer |
| Sequence-based reagent | TTCAAAGCTGCTCTCCCATT | This study | 1806_rev | qPCR primer |
| Sequence-based reagent | GAAACCATTGTTTTAAGGCAACTT | This study | 2898_fw | qPCR primer |
| Sequence-based reagent | TCGGAACCTCTTCATTGCTT | This study | 2898_rev | qPCR primer |
| Sequence-based reagent | CAATTTCTTCTCTCGCTGTTGC | This study | 3323_fw | qPCR primer |
| Sequence-based reagent | TTGCGGCATCACACAATTGA | This study | 3323_rev | qPCR primer |
| Sequence-based reagent | ACGGACCAAGGAGTCTAGCA | This study | 28S_fw | qPCR primer |
| Sequence-based reagent | GTTCCCACCTGCATTCACTT | This study | 28S_rev | qPCR primer |
| Sequence-based reagent | TCTCTCATTTTCCATTGAACCA | This study | NTS_fw | qPCR primer |
| Sequence-based reagent | TTCAGGGTCGGTAGAGTCAGA | This study | NTS_rev | qPCR primer |
| Sequence-based reagent | ATGCTTTGGCCACTGTTCCT | This study | Tel1-R_fw | qPCR primer |
| Sequence-based reagent | TCAAAACCGCAAAAACGATG | This study | Tel1-R_rev | qPCR primer |
| Sequence-based reagent | ACCACAAATGGAGCCAAAAG | This study | ars3004_fw | qPCR primer |
| Sequence-based reagent | TTGCATCCAAGGCATCATAA | This study | ars3004_rev | qPCR primer |
| Commercial assay or kit | ChIP DNA Clean&Concentrator | Zymo research | D5205 |  |
| Commercial assay or kit | ChIP-Adembeads ProtA | Ademtech | 4242 |  |
| Commercial assay or kit | ChIP-Adembeads ProtG | Ademtech | 4342 |  |
| Commercial assay or kit | Absolute qPCR SYBR Green Mix | ThermoFisher Scientific | AB-1158/B |  |
| Commercial assay or kit | Reagents for coupled transcription/translation reactions | biotechrabbit | BR1402002 |  |
| Commercial assay or kit | ProtA µMacs | Miltenyibiotec | 130-071-001 |  |
| Commercial assay or kit | ProtG µMacs | Miltenyibiotec | 130-071-101 |  |
| Chemical compound, drug | ATP-γ-S | SIGMA | A1388 |  |
| Chemical compound, drug | p-Nitrobenzyl mesylate (PNBM) | Abcam | ab138910 |  |
| Chemical compound, drug | Anydrotetracycline hydrochloride | SIGMA | 37919 |  |
| Chemical compound, drug | 1-NA-PP1 | CAYMAN Chemicals | 10954 |  |
| Chemical compound, drug | Hydroxyurea | SIGMA | H8627 |  |
| software, algorithm | Prism | GraphPad |  |  |
| software, algorithm | Metamorph | Metamorph |  |  |
| software, algorithm | ImageJ | ImageJ |  |  |
| software, algorithm | FlowJo | FlowJo |  |  |
