# Supplementary figures and images for: The CDK Pef1 and protein phosphatase 4 oppose each other for regulating cohesin binding to fission yeast chromosomes
Source: eLife journal article supplement (doi:10.7554/elife.50556), 2020-01-02

Figure 1\_supplement 1

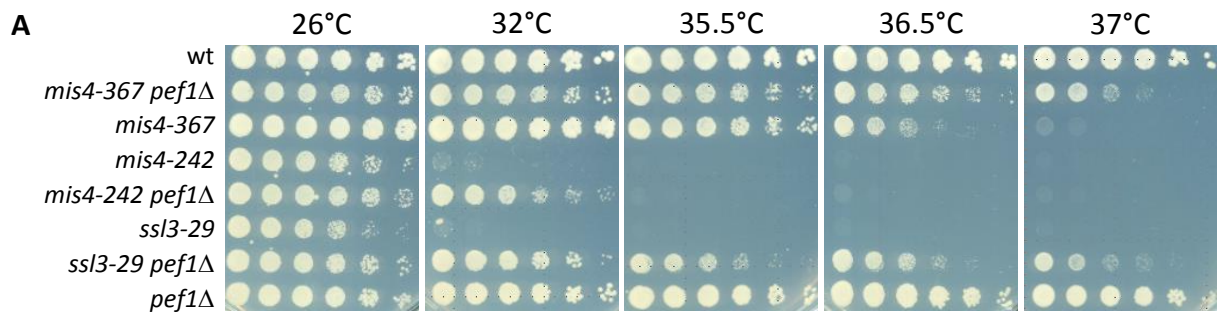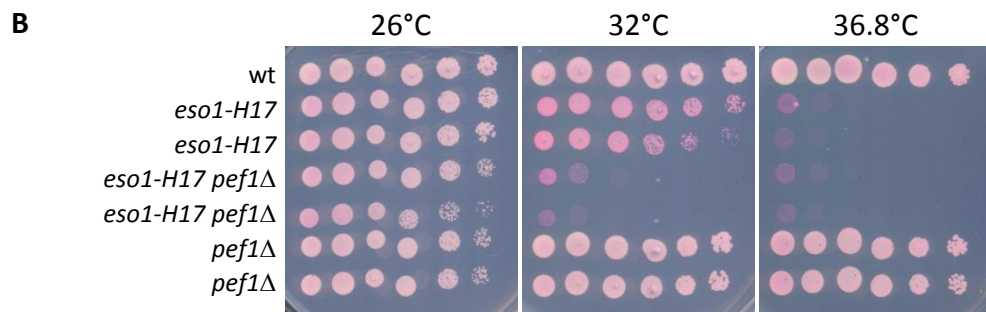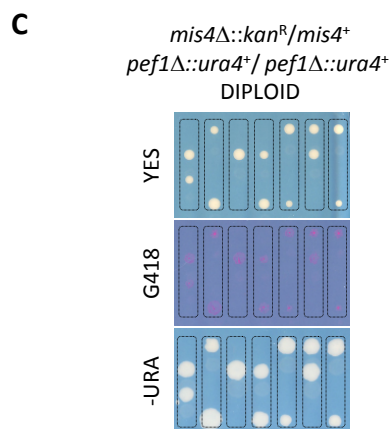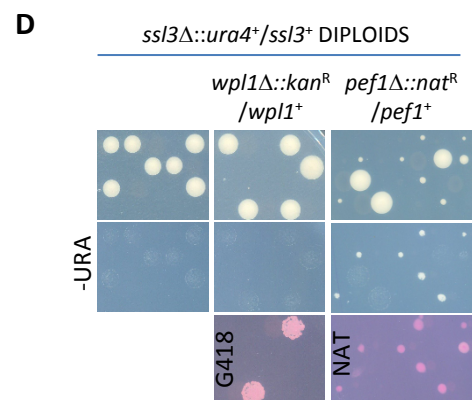

Supplement: supp [file elife_poa_e50556_Figure_1_figure_supplement_1.pdf › elife_poa_e50556_Figure_1_figure_supplement_1.pdf]

Figure 2\_supplement 1

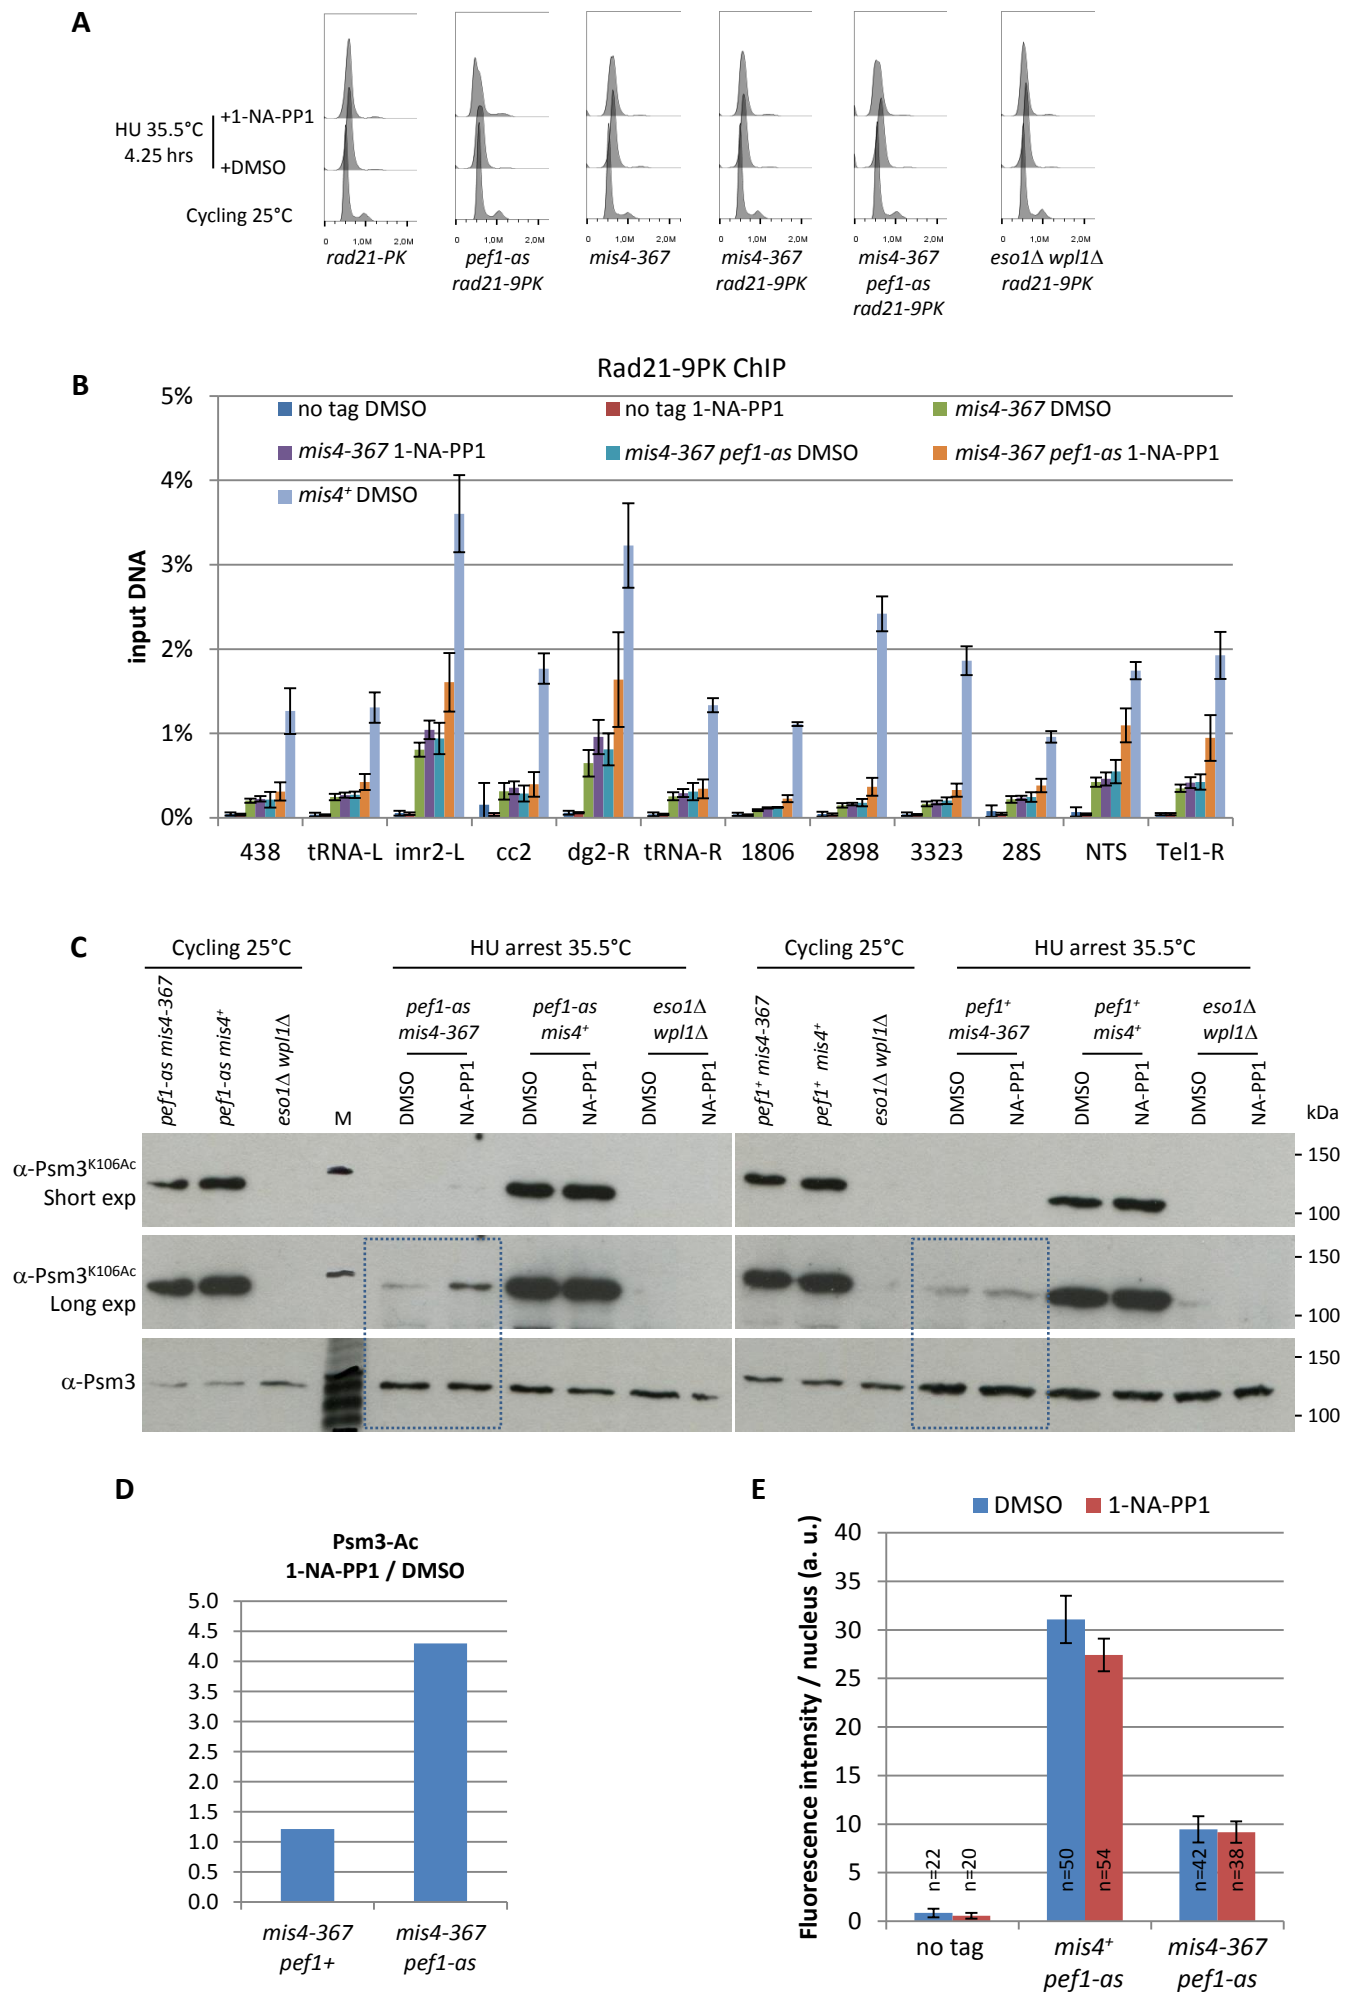

Supplement: supp [file elife_poa_e50556_Figure_2_figure_supplement_1.pdf › elife_poa_e50556_Figure_2_figure_supplement_1.pdf]

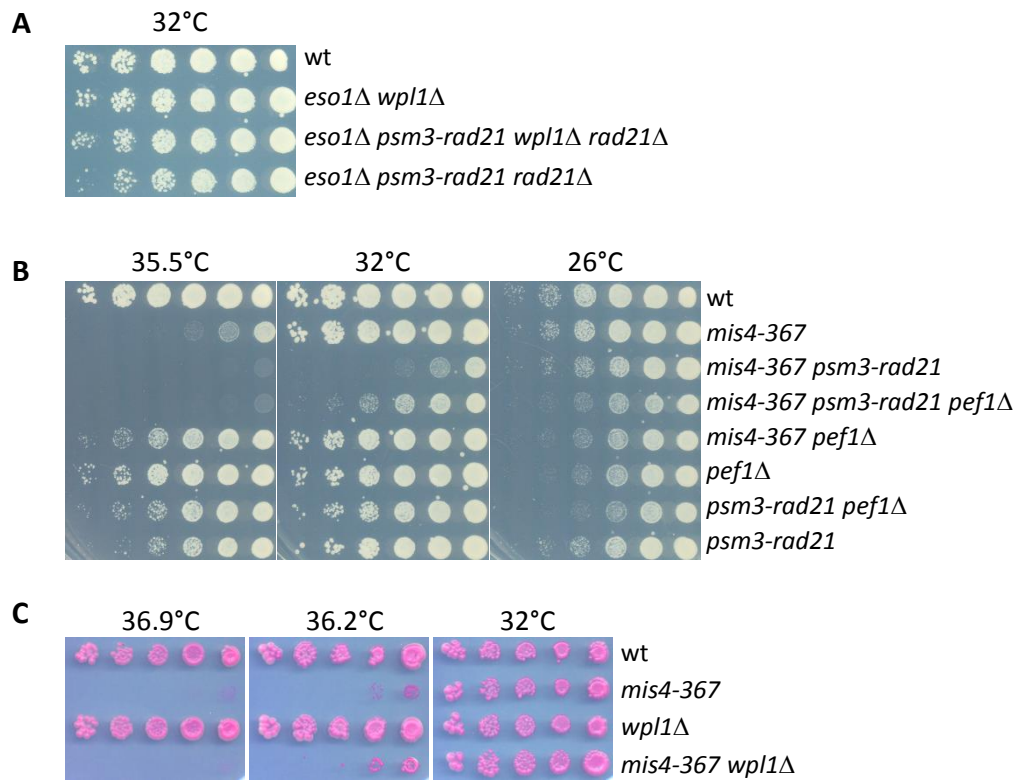

Supplement: supp [file elife_poa_e50556_Figure_3_figure_supplement_1.pdf › elife_poa_e50556_Figure_3_figure_supplement_1.pdf]

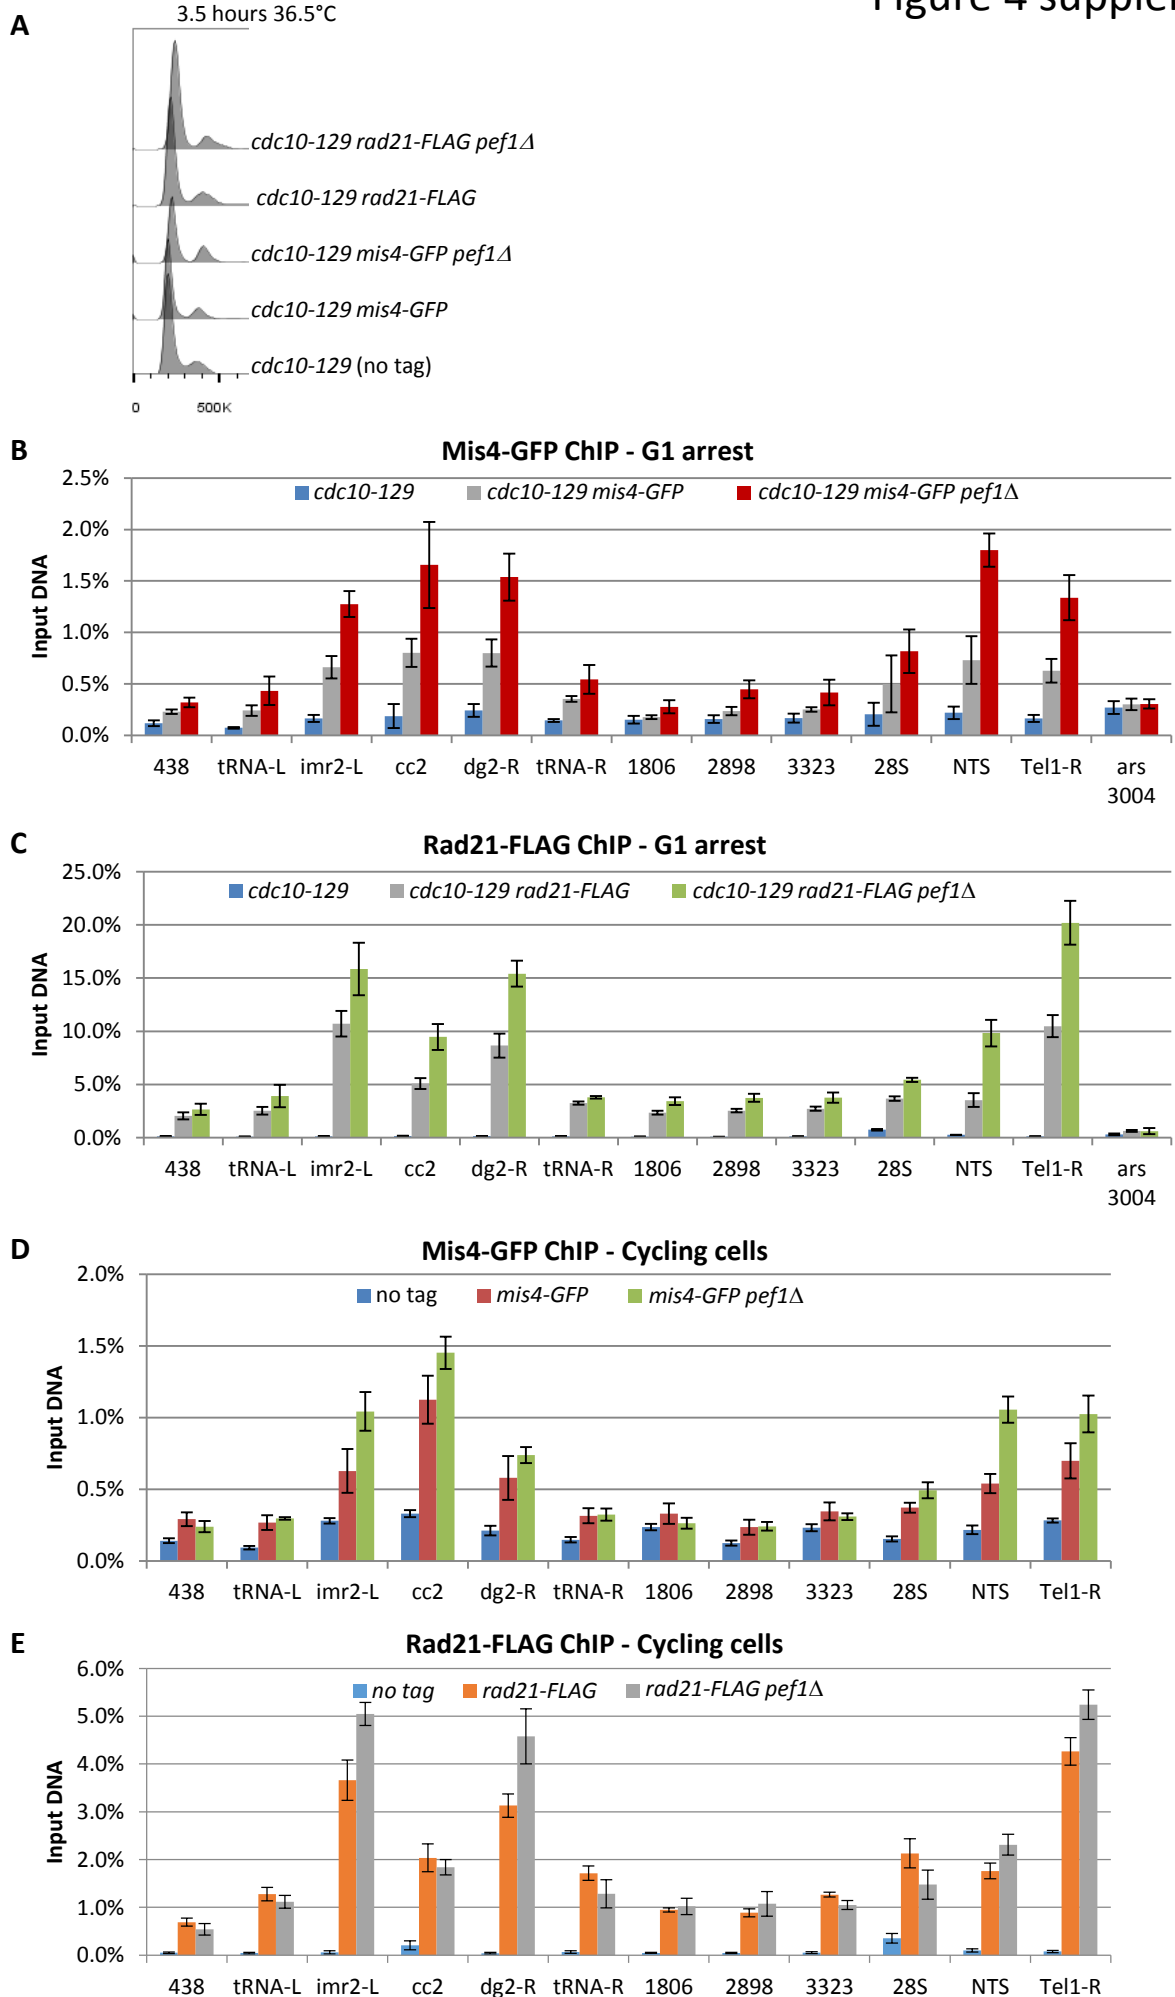

Supplement: supp [file elife_poa_e50556_Figure_4_figure_supplement_1.pdf › elife_poa_e50556_Figure_4_figure_supplement_1.pdf]

Figure 5 supplement 2

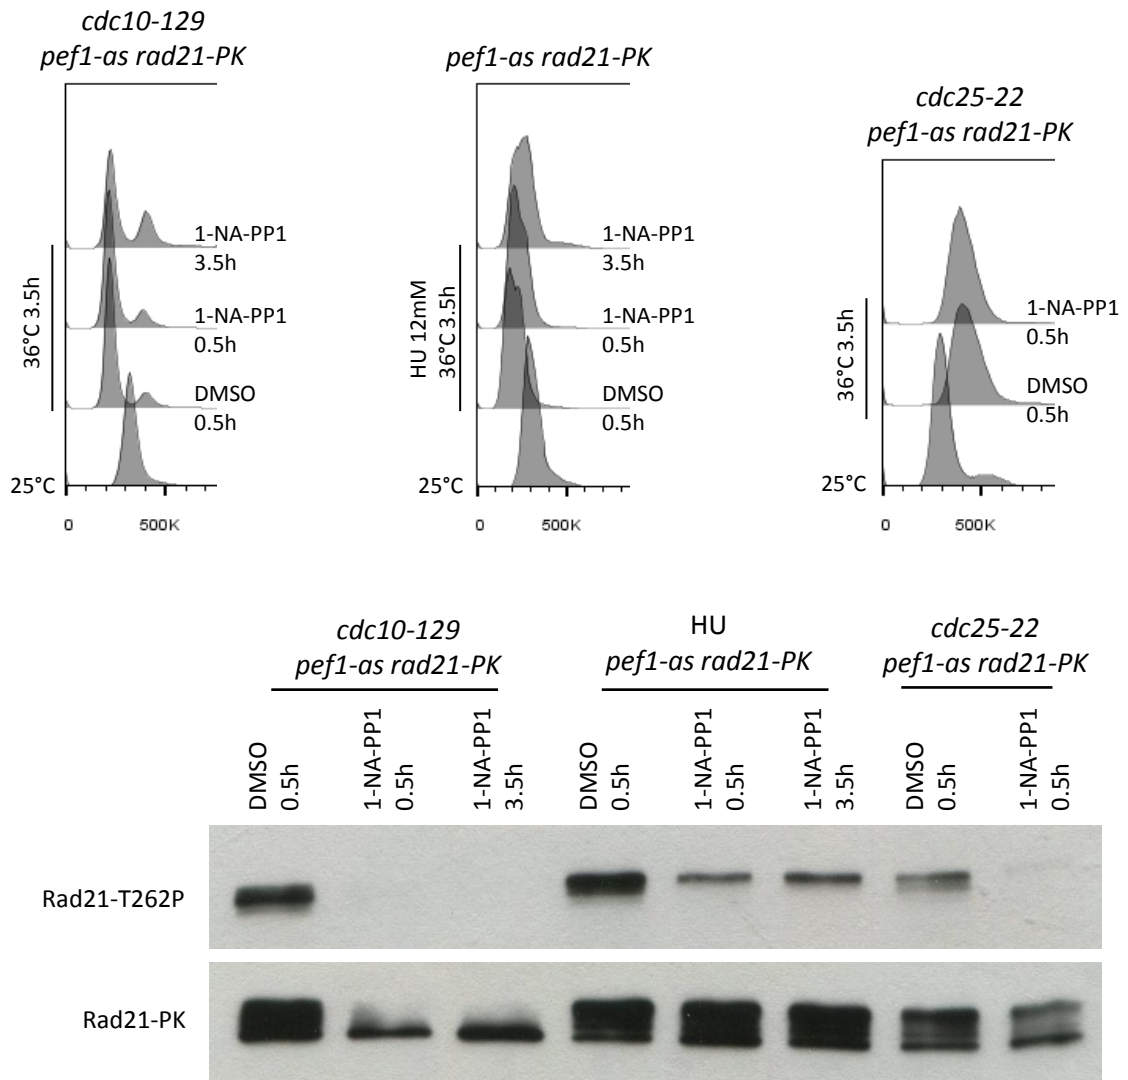

Supplement: supp [file elife_poa_e50556_Figure_5_figure_supplement_2.pdf › elife_poa_e50556_Figure_5_figure_supplement_2.pdf]

Figure 7\_supplement 1

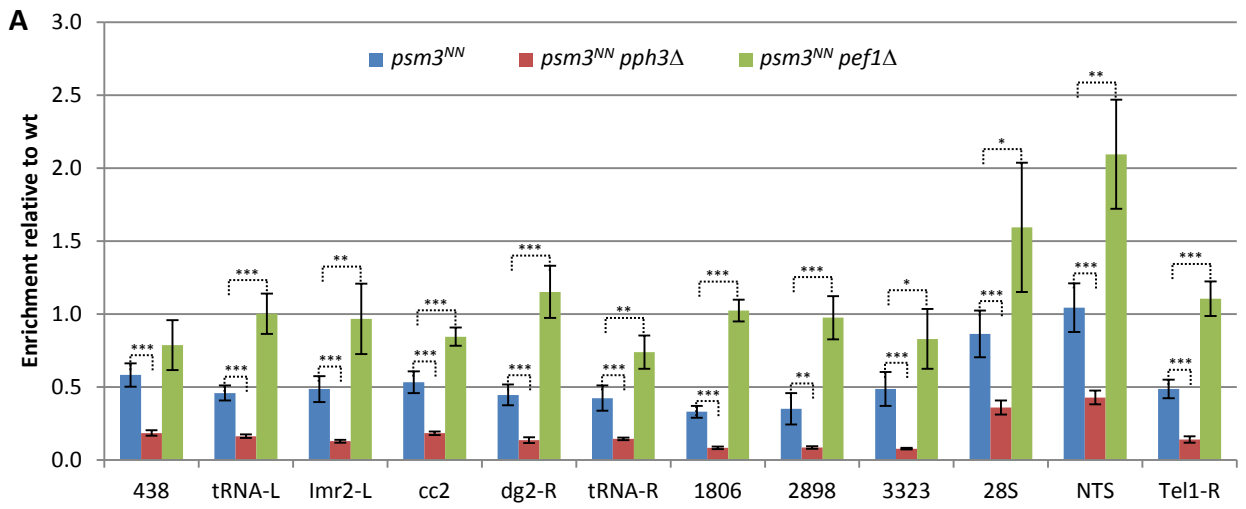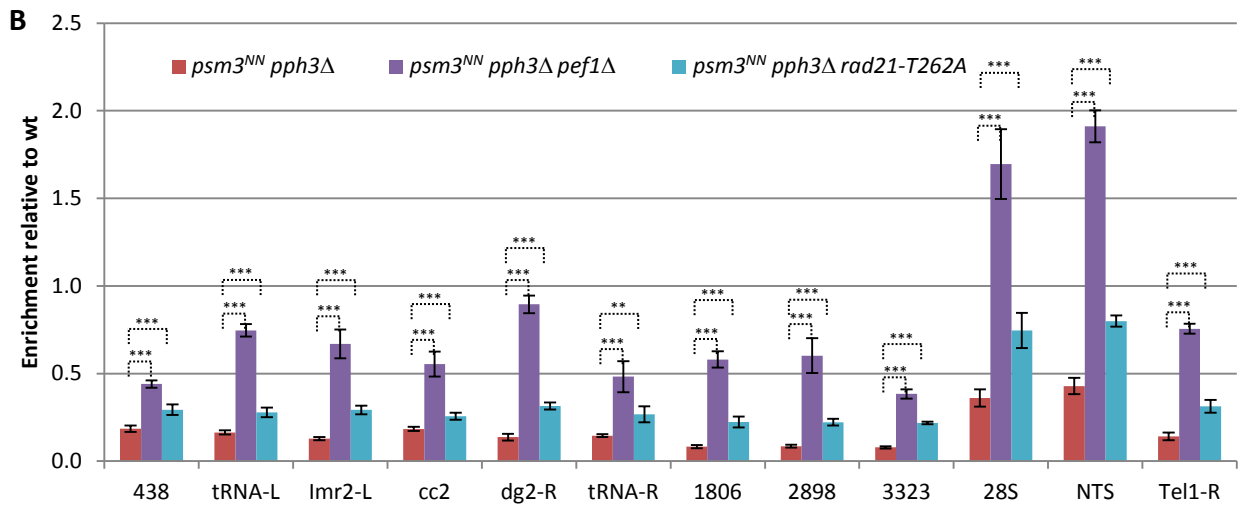

**C**

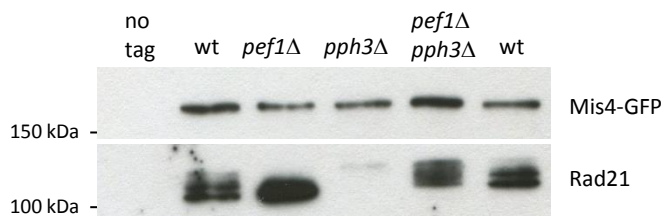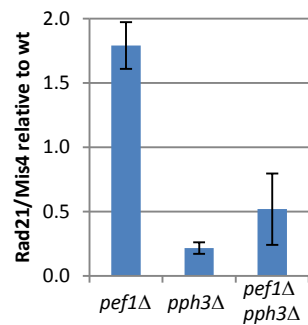

Supplement: supp [file elife_poa_e50556_Figure_7_figure_supplement_1.pdf › elife_poa_e50556_Figure_7_figure_supplement_1.pdf]
